# Supplementary material for: The emergence and evolution of gene expression in genome regions replete with regulatory motifs
Source: eLife. 2024 Dec 20;13:RP98654. doi: 10.7554/eLife.98654 (PMC11661796; doi:10.7554/eLife.98654)
Supplement: Source data 1. — Data is stored as an Excel spreadsheet. [file elife-98654-data1.xlsx]

## Sheet: Primers
Category	Construct name	Type	Template (PCR only)	Description	Sequence (5'-3')
pMR1 cloning	pMR1_vector_gibson_assembly_forward	primer	pMR1	Primer to open the pMR1 plasmid flanking the EcoRI (GAATTC) and BamHI (GGATCC) cut sites	CCCGGGTACCTAGAAT
	pMR1_vector_gibson_assembly_reverse	primer	pMR1	Primer to open the pMR1 plasmid flanking the EcoRI (GAATTC) and BamHI (GGATCC) cut sites	TCGCAAGGGAGGTTG
	pMR1_construct_gibson_assembly_forward	primer	Insert of interest	Primer to amplify inserts and clone them into pMR1, flanked with EcoR (GAATTC) and BamHI (GGATCC) cut sites	CAACCTCCCTTGCGAATTTTAATTAAGGCTGAATTC
	pMR1_construct_gibson_assembly_reverse	primer	Insert of interest	Primer to amplify inserts and clone them into pMR1, flanked with EcoR (GAATTC) and BamHI (GGATCC) cut sites	ATTCTAGGTACCCGGGGATCGCGATCGCAAGGATCC
Control constructs	J23110_fragment_GFP_orientation	ultramer		Ultramers containing the bba_j23110 promoter sequence oriented towards the GFP coding sequence. Amplify with "pMR1_construct_gibson_assembly_forward" and "fragment_downstream_of_j23110."	GCTAGCATTGTACCTAGGACTGAGCTAGCCGTAAAGAATTCAGCCTTAATTAAAATTCGCAAGGGAGGTTG
	j23110_fragment_mCherry_orientation	ultramer		Ultramers containing the bba_j23110 promoter sequence oriented towards the mCherry coding sequence. Amplify with "pMR1_construct_gibson_assembly_forward" and "fragment_downstream_of_j23110."	CGCAAGGATCCTTTACGGCTAGCTCAGTCCTAGGTACAATGCTAGCGAATTCAGCCTTAATTAAAATTCGCAAGGGAGGTTG
	fragment_downstream_of_j23110	primer		Reverse primer to amplify the GFP/mCherry ultramers. The forward primer is "pMR1_construct_gibson_assembly_forward." Use these two primers to amplify the j23110 GFP/mCherry ultramers.	CAATGCTAGCGGATCCTTGCG
Template sequence (P1-P25)	P1-FWD	primer	E coli genome (K12 / DH5a)	Forward/reverse primer for the respective promoter island. Use this to amplify the sequence out of the genome. You need to run an additional PCR with primers "pMR1_construct_gibson_assembly_forward" and "pMR1_construct_gibson_assembly_reverse" afterwards before cloning into pMR1.	ggctgaattctacgccagaaagtattttagcc
	P1-REV	primer	E coli genome (K12 / DH5a)	Forward/reverse primer for the respective promoter island. Use this to amplify the sequence out of the genome. You need to run an additional PCR with primers "pMR1_construct_gibson_assembly_forward" and "pMR1_construct_gibson_assembly_reverse" afterwards before cloning into pMR1.	gcaaggatccatacagctaccggttgccaa
	P2-FWD	primer	E coli genome (K12 / DH5a)	Forward/reverse primer for the respective promoter island. Use this to amplify the sequence out of the genome. You need to run an additional PCR with primers "pMR1_construct_gibson_assembly_forward" and "pMR1_construct_gibson_assembly_reverse" afterwards before cloning into pMR1.	ggctgaattcttacttattccaattcgttactat
	P2-REV	primer	E coli genome (K12 / DH5a)	Forward/reverse primer for the respective promoter island. Use this to amplify the sequence out of the genome. You need to run an additional PCR with primers "pMR1_construct_gibson_assembly_forward" and "pMR1_construct_gibson_assembly_reverse" afterwards before cloning into pMR1.	gcaaggatccaatggcgcatattgtttttgtta
	P3-FWD	primer	E coli genome (K12 / DH5a)	Forward/reverse primer for the respective promoter island. Use this to amplify the sequence out of the genome. You need to run an additional PCR with primers "pMR1_construct_gibson_assembly_forward" and "pMR1_construct_gibson_assembly_reverse" afterwards before cloning into pMR1.	ggctgaattcgaaaaataatttcttgcgttattt
	P3-REV	primer	E coli genome (K12 / DH5a)	Forward/reverse primer for the respective promoter island. Use this to amplify the sequence out of the genome. You need to run an additional PCR with primers "pMR1_construct_gibson_assembly_forward" and "pMR1_construct_gibson_assembly_reverse" afterwards before cloning into pMR1.	gcaaggatcctaattagacactactttacaggt
	P4-FWD	primer	E coli genome (K12 / DH5a)	Forward/reverse primer for the respective promoter island. Use this to amplify the sequence out of the genome. You need to run an additional PCR with primers "pMR1_construct_gibson_assembly_forward" and "pMR1_construct_gibson_assembly_reverse" afterwards before cloning into pMR1.	ggctgaattctctcaatatgtagaatgaatttaa
	P4-REV	primer	E coli genome (K12 / DH5a)	Forward/reverse primer for the respective promoter island. Use this to amplify the sequence out of the genome. You need to run an additional PCR with primers "pMR1_construct_gibson_assembly_forward" and "pMR1_construct_gibson_assembly_reverse" afterwards before cloning into pMR1.	gcaaggatcctgtaactatgcacaaatgtagac
	P5-FWD	primer	E coli genome (K12 / DH5a)	Forward/reverse primer for the respective promoter island. Use this to amplify the sequence out of the genome. You need to run an additional PCR with primers "pMR1_construct_gibson_assembly_forward" and "pMR1_construct_gibson_assembly_reverse" afterwards before cloning into pMR1.	ggctgaattctacataaggtaaaaaaagcacatt
	P5-REV	primer	E coli genome (K12 / DH5a)	Forward/reverse primer for the respective promoter island. Use this to amplify the sequence out of the genome. You need to run an additional PCR with primers "pMR1_construct_gibson_assembly_forward" and "pMR1_construct_gibson_assembly_reverse" afterwards before cloning into pMR1.	gcaaggatcctaccgcgctaactgtttcag
	P6-FWD	primer	E coli genome (K12 / DH5a)	Forward/reverse primer for the respective promoter island. Use this to amplify the sequence out of the genome. You need to run an additional PCR with primers "pMR1_construct_gibson_assembly_forward" and "pMR1_construct_gibson_assembly_reverse" afterwards before cloning into pMR1.	ggctgaattccctcaagaatatgctttgcct
	P6-REV	primer	E coli genome (K12 / DH5a)	Forward/reverse primer for the respective promoter island. Use this to amplify the sequence out of the genome. You need to run an additional PCR with primers "pMR1_construct_gibson_assembly_forward" and "pMR1_construct_gibson_assembly_reverse" afterwards before cloning into pMR1.	gcaaggatcctacaggacctttttatttgatatt
	P7-FWD	primer	E coli genome (K12 / DH5a)	Forward/reverse primer for the respective promoter island. Use this to amplify the sequence out of the genome. You need to run an additional PCR with primers "pMR1_construct_gibson_assembly_forward" and "pMR1_construct_gibson_assembly_reverse" afterwards before cloning into pMR1.	ggctgaattcattgatagattaaaaattgcatag
	P7-REV	primer	E coli genome (K12 / DH5a)	Forward/reverse primer for the respective promoter island. Use this to amplify the sequence out of the genome. You need to run an additional PCR with primers "pMR1_construct_gibson_assembly_forward" and "pMR1_construct_gibson_assembly_reverse" afterwards before cloning into pMR1.	gcaaggatccaacttcgatttttagcaattagtg
	P8-FWD	primer	E coli genome (K12 / DH5a)	Forward/reverse primer for the respective promoter island. Use this to amplify the sequence out of the genome. You need to run an additional PCR with primers "pMR1_construct_gibson_assembly_forward" and "pMR1_construct_gibson_assembly_reverse" afterwards before cloning into pMR1.	ggctgaattcatcatttattgaaagtataatcca
	P8-REV	primer	E coli genome (K12 / DH5a)	Forward/reverse primer for the respective promoter island. Use this to amplify the sequence out of the genome. You need to run an additional PCR with primers "pMR1_construct_gibson_assembly_forward" and "pMR1_construct_gibson_assembly_reverse" afterwards before cloning into pMR1.	gcaaggatccccattaacttcgaatccatcc
	P9-FWD	primer	E coli genome (K12 / DH5a)	Forward/reverse primer for the respective promoter island. Use this to amplify the sequence out of the genome. You need to run an additional PCR with primers "pMR1_construct_gibson_assembly_forward" and "pMR1_construct_gibson_assembly_reverse" afterwards before cloning into pMR1.	ggctgaattcttatggtgcaaaaataacacattt
	P9-REV	primer	E coli genome (K12 / DH5a)	Forward/reverse primer for the respective promoter island. Use this to amplify the sequence out of the genome. You need to run an additional PCR with primers "pMR1_construct_gibson_assembly_forward" and "pMR1_construct_gibson_assembly_reverse" afterwards before cloning into pMR1.	gcaaggatccaaatttacattaaaacaacaaaaa
	P10-FWD	primer	E coli genome (K12 / DH5a)	Forward/reverse primer for the respective promoter island. Use this to amplify the sequence out of the genome. You need to run an additional PCR with primers "pMR1_construct_gibson_assembly_forward" and "pMR1_construct_gibson_assembly_reverse" afterwards before cloning into pMR1.	ggctgaattccgcaggcatatattgaactct
	P10-REV	primer	E coli genome (K12 / DH5a)	Forward/reverse primer for the respective promoter island. Use this to amplify the sequence out of the genome. You need to run an additional PCR with primers "pMR1_construct_gibson_assembly_forward" and "pMR1_construct_gibson_assembly_reverse" afterwards before cloning into pMR1.	gcaaggatccttaactgttttaagatgctgattt
	P11-FWD	primer	E coli genome (K12 / DH5a)	Forward/reverse primer for the respective promoter island. Use this to amplify the sequence out of the genome. You need to run an additional PCR with primers "pMR1_construct_gibson_assembly_forward" and "pMR1_construct_gibson_assembly_reverse" afterwards before cloning into pMR1.	ggctgaattcttttggtgttgttatattttttat
	P11-REV	primer	E coli genome (K12 / DH5a)	Forward/reverse primer for the respective promoter island. Use this to amplify the sequence out of the genome. You need to run an additional PCR with primers "pMR1_construct_gibson_assembly_forward" and "pMR1_construct_gibson_assembly_reverse" afterwards before cloning into pMR1.	gcaaggatcccgcaaaggattataaaaatattta
	P12-FWD	primer	E coli genome (K12 / DH5a)	Forward/reverse primer for the respective promoter island. Use this to amplify the sequence out of the genome. You need to run an additional PCR with primers "pMR1_construct_gibson_assembly_forward" and "pMR1_construct_gibson_assembly_reverse" afterwards before cloning into pMR1.	ggctgaattctgttttatacattgtatttagatg
	P12-REV	primer	E coli genome (K12 / DH5a)	Forward/reverse primer for the respective promoter island. Use this to amplify the sequence out of the genome. You need to run an additional PCR with primers "pMR1_construct_gibson_assembly_forward" and "pMR1_construct_gibson_assembly_reverse" afterwards before cloning into pMR1.	gcaaggatcctattcgcattgtatatatcactg
	P13-FWD	primer	E coli genome (K12 / DH5a)	Forward/reverse primer for the respective promoter island. Use this to amplify the sequence out of the genome. You need to run an additional PCR with primers "pMR1_construct_gibson_assembly_forward" and "pMR1_construct_gibson_assembly_reverse" afterwards before cloning into pMR1.	ggctgaattcttgcattactaccttatataacg
	P13-REV	primer	E coli genome (K12 / DH5a)	Forward/reverse primer for the respective promoter island. Use this to amplify the sequence out of the genome. You need to run an additional PCR with primers "pMR1_construct_gibson_assembly_forward" and "pMR1_construct_gibson_assembly_reverse" afterwards before cloning into pMR1.	gcaaggatccggtaaaatttgtttgttagtgaaa
	P14-FWD	primer	E coli genome (K12 / DH5a)	Forward/reverse primer for the respective promoter island. Use this to amplify the sequence out of the genome. You need to run an additional PCR with primers "pMR1_construct_gibson_assembly_forward" and "pMR1_construct_gibson_assembly_reverse" afterwards before cloning into pMR1.	ggctgaattccgttgaaggcatgatgaataaa
	P14-REV	primer	E coli genome (K12 / DH5a)	Forward/reverse primer for the respective promoter island. Use this to amplify the sequence out of the genome. You need to run an additional PCR with primers "pMR1_construct_gibson_assembly_forward" and "pMR1_construct_gibson_assembly_reverse" afterwards before cloning into pMR1.	gcaaggatcccatttcattatcaatagtttgcaa
	P15-FWD	primer	E coli genome (K12 / DH5a)	Forward/reverse primer for the respective promoter island. Use this to amplify the sequence out of the genome. You need to run an additional PCR with primers "pMR1_construct_gibson_assembly_forward" and "pMR1_construct_gibson_assembly_reverse" afterwards before cloning into pMR1.	ggctgaattcacgttttggaatttttttcggtg
	P15-REV	primer	E coli genome (K12 / DH5a)	Forward/reverse primer for the respective promoter island. Use this to amplify the sequence out of the genome. You need to run an additional PCR with primers "pMR1_construct_gibson_assembly_forward" and "pMR1_construct_gibson_assembly_reverse" afterwards before cloning into pMR1.	gcaaggatcctgactcataagtattttacttatt
	P16-FWD	primer	E coli genome (K12 / DH5a)	Forward/reverse primer for the respective promoter island. Use this to amplify the sequence out of the genome. You need to run an additional PCR with primers "pMR1_construct_gibson_assembly_forward" and "pMR1_construct_gibson_assembly_reverse" afterwards before cloning into pMR1.	ggctgaattcattatttccgcaaagagatgttt
	P16-REV	primer	E coli genome (K12 / DH5a)	Forward/reverse primer for the respective promoter island. Use this to amplify the sequence out of the genome. You need to run an additional PCR with primers "pMR1_construct_gibson_assembly_forward" and "pMR1_construct_gibson_assembly_reverse" afterwards before cloning into pMR1.	gcaaggatcctgttgcgtcaaatcttacatac
	P17-FWD	primer	E coli genome (K12 / DH5a)	Forward/reverse primer for the respective promoter island. Use this to amplify the sequence out of the genome. You need to run an additional PCR with primers "pMR1_construct_gibson_assembly_forward" and "pMR1_construct_gibson_assembly_reverse" afterwards before cloning into pMR1.	ggctgaattcattaattgatgttattgtaagtgt
	P17-REV	primer	E coli genome (K12 / DH5a)	Forward/reverse primer for the respective promoter island. Use this to amplify the sequence out of the genome. You need to run an additional PCR with primers "pMR1_construct_gibson_assembly_forward" and "pMR1_construct_gibson_assembly_reverse" afterwards before cloning into pMR1.	gcaaggatccgaaacaggagattttaagtgatg
	P18-FWD	primer	E coli genome (K12 / DH5a)	Forward/reverse primer for the respective promoter island. Use this to amplify the sequence out of the genome. You need to run an additional PCR with primers "pMR1_construct_gibson_assembly_forward" and "pMR1_construct_gibson_assembly_reverse" afterwards before cloning into pMR1.	ggctgaattctaattataatattatacagcgttt
	P18-REV	primer	E coli genome (K12 / DH5a)	Forward/reverse primer for the respective promoter island. Use this to amplify the sequence out of the genome. You need to run an additional PCR with primers "pMR1_construct_gibson_assembly_forward" and "pMR1_construct_gibson_assembly_reverse" afterwards before cloning into pMR1.	gcaaggatccaacccttaaaataaacccagaag
	P19-FWD	primer	E coli genome (K12 / DH5a)	Forward/reverse primer for the respective promoter island. Use this to amplify the sequence out of the genome. You need to run an additional PCR with primers "pMR1_construct_gibson_assembly_forward" and "pMR1_construct_gibson_assembly_reverse" afterwards before cloning into pMR1.	ggctgaattcgcttatcaaatcattaccagaat
	P19-REV	primer	E coli genome (K12 / DH5a)	Forward/reverse primer for the respective promoter island. Use this to amplify the sequence out of the genome. You need to run an additional PCR with primers "pMR1_construct_gibson_assembly_forward" and "pMR1_construct_gibson_assembly_reverse" afterwards before cloning into pMR1.	gcaaggatcctcagttaattttggggcgtga
	P20-FWD	primer	E coli genome (K12 / DH5a)	Forward/reverse primer for the respective promoter island. Use this to amplify the sequence out of the genome. You need to run an additional PCR with primers "pMR1_construct_gibson_assembly_forward" and "pMR1_construct_gibson_assembly_reverse" afterwards before cloning into pMR1.	ggctgaattcaaaccagaacaccattaacgc
	P20-REV	primer	E coli genome (K12 / DH5a)	Forward/reverse primer for the respective promoter island. Use this to amplify the sequence out of the genome. You need to run an additional PCR with primers "pMR1_construct_gibson_assembly_forward" and "pMR1_construct_gibson_assembly_reverse" afterwards before cloning into pMR1.	gcaaggatccttcctgaaatcttaagggtaag
	P21-FWD	primer	E coli genome (K12 / DH5a)	Forward/reverse primer for the respective promoter island. Use this to amplify the sequence out of the genome. You need to run an additional PCR with primers "pMR1_construct_gibson_assembly_forward" and "pMR1_construct_gibson_assembly_reverse" afterwards before cloning into pMR1.	ggctgaattcaacgatttcctttacgatactat
	P21-REV	primer	E coli genome (K12 / DH5a)	Forward/reverse primer for the respective promoter island. Use this to amplify the sequence out of the genome. You need to run an additional PCR with primers "pMR1_construct_gibson_assembly_forward" and "pMR1_construct_gibson_assembly_reverse" afterwards before cloning into pMR1.	gcaaggatccattagaacaggaatggattttct
	P22-FWD	primer	E coli genome (K12 / DH5a)	Forward/reverse primer for the respective promoter island. Use this to amplify the sequence out of the genome. You need to run an additional PCR with primers "pMR1_construct_gibson_assembly_forward" and "pMR1_construct_gibson_assembly_reverse" afterwards before cloning into pMR1.	ggctgaattcaggctatattacctcttccct
	P22-REV	primer	E coli genome (K12 / DH5a)	Forward/reverse primer for the respective promoter island. Use this to amplify the sequence out of the genome. You need to run an additional PCR with primers "pMR1_construct_gibson_assembly_forward" and "pMR1_construct_gibson_assembly_reverse" afterwards before cloning into pMR1.	gcaaggatcctgagggcgcaaccttaacat
	P23-FWD	primer	E coli genome (K12 / DH5a)	Forward/reverse primer for the respective promoter island. Use this to amplify the sequence out of the genome. You need to run an additional PCR with primers "pMR1_construct_gibson_assembly_forward" and "pMR1_construct_gibson_assembly_reverse" afterwards before cloning into pMR1.	ggctgaattctgtttgctgtaattatctgatttt
	P23-REV	primer	E coli genome (K12 / DH5a)	Forward/reverse primer for the respective promoter island. Use this to amplify the sequence out of the genome. You need to run an additional PCR with primers "pMR1_construct_gibson_assembly_forward" and "pMR1_construct_gibson_assembly_reverse" afterwards before cloning into pMR1.	gcaaggatccgccttttctttcttgttaattata
	P24-FWD	primer	E coli genome (K12 / DH5a)	Forward/reverse primer for the respective promoter island. Use this to amplify the sequence out of the genome. You need to run an additional PCR with primers "pMR1_construct_gibson_assembly_forward" and "pMR1_construct_gibson_assembly_reverse" afterwards before cloning into pMR1.	ggctgaattcttgattcaattgatagctatgag
	P24-REV	primer	E coli genome (K12 / DH5a)	Forward/reverse primer for the respective promoter island. Use this to amplify the sequence out of the genome. You need to run an additional PCR with primers "pMR1_construct_gibson_assembly_forward" and "pMR1_construct_gibson_assembly_reverse" afterwards before cloning into pMR1.	gcaaggatcctcgcatataatgaataaatatata
	P25-FWD	primer	E coli genome (K12 / DH5a)	Forward/reverse primer for the respective promoter island. Use this to amplify the sequence out of the genome. You need to run an additional PCR with primers "pMR1_construct_gibson_assembly_forward" and "pMR1_construct_gibson_assembly_reverse" afterwards before cloning into pMR1.	ggctgaattcattactaattggaatttgatgttg
	P25-REV	primer	E coli genome (K12 / DH5a)	Forward/reverse primer for the respective promoter island. Use this to amplify the sequence out of the genome. You need to run an additional PCR with primers "pMR1_construct_gibson_assembly_forward" and "pMR1_construct_gibson_assembly_reverse" afterwards before cloning into pMR1.	gcaaggatcctttatttccgcataatcagcca
Illumina sequencing primer indexes	fwd_alpha_1_mCherry	primer	Sorted library	Illumina sequencing index forward primer. "Alpha/Beta/Gamma" refer to the technical replicate. The numbers "1/2/3/4" refer to the bins with none to high expression respectively. "GFP" is for GFP expression, and "mCherry" is for RFP expression. Unique barcode is written in lowercase at the beginning of the sequence.	gctgacctgaGCGAATTTTAATTAAGGCTGAATTC
	fwd_alpha_2_mCherry	primer	Sorted library	Illumina sequencing index forward primer. "Alpha/Beta/Gamma" refer to the technical replicate. The numbers "1/2/3/4" refer to the bins with none to high expression respectively. "GFP" is for GFP expression, and "mCherry" is for mCherry expression. Unique barcode is written in lowercase at the beginning of the sequence.	cgacgtagtcGCGAATTTTAATTAAGGCTGAATTC
	fwd_alpha_3_mCherry	primer	Sorted library	Illumina sequencing index forward primer. "Alpha/Beta/Gamma" refer to the technical replicate. The numbers "1/2/3/4" refer to the bins with none to high expression respectively. "GFP" is for GFP expression, and "mCherry" is for mCherry expression. Unique barcode is written in lowercase at the beginning of the sequence.	tcaatgatcgGCGAATTTTAATTAAGGCTGAATTC
	fwd_alpha_4_mCherry	primer	Sorted library	Illumina sequencing index forward primer. "Alpha/Beta/Gamma" refer to the technical replicate. The numbers "1/2/3/4" refer to the bins with none to high expression respectively. "GFP" is for GFP expression, and "mCherry" is for mCherry expression. Unique barcode is written in lowercase at the beginning of the sequence.	agtctcggcaGCGAATTTTAATTAAGGCTGAATTC
	fwd_beta_1_mCherry	primer	Sorted library	Illumina sequencing index forward primer. "Alpha/Beta/Gamma" refer to the technical replicate. The numbers "1/2/3/4" refer to the bins with none to high expression respectively. "GFP" is for GFP expression, and "mCherry" is for mCherry expression. Unique barcode is written in lowercase at the beginning of the sequence.	gatatagctcGCGAATTTTAATTAAGGCTGAATTC
	fwd_beta_2_mCherry	primer	Sorted library	Illumina sequencing index forward primer. "Alpha/Beta/Gamma" refer to the technical replicate. The numbers "1/2/3/4" refer to the bins with none to high expression respectively. "GFP" is for GFP expression, and "mCherry" is for mCherry expression. Unique barcode is written in lowercase at the beginning of the sequence.	cgtccgacttGCGAATTTTAATTAAGGCTGAATTC
	fwd_beta_3_mCherry	primer	Sorted library	Illumina sequencing index forward primer. "Alpha/Beta/Gamma" refer to the technical replicate. The numbers "1/2/3/4" refer to the bins with none to high expression respectively. "GFP" is for GFP expression, and "mCherry" is for mCherry expression. Unique barcode is written in lowercase at the beginning of the sequence.	ctcgtgcctaGCGAATTTTAATTAAGGCTGAATTC
	fwd_beta_4_mCherry	primer	Sorted library	Illumina sequencing index forward primer. "Alpha/Beta/Gamma" refer to the technical replicate. The numbers "1/2/3/4" refer to the bins with none to high expression respectively. "GFP" is for GFP expression, and "mCherry" is for mCherry expression. Unique barcode is written in lowercase at the beginning of the sequence.	taagattgccGCGAATTTTAATTAAGGCTGAATTC
	fwd_gamma_1_mCherry	primer	Sorted library	Illumina sequencing index forward primer. "Alpha/Beta/Gamma" refer to the technical replicate. The numbers "1/2/3/4" refer to the bins with none to high expression respectively. "GFP" is for GFP expression, and "mCherry" is for mCherry expression. Unique barcode is written in lowercase at the beginning of the sequence.	aggcctgactGCGAATTTTAATTAAGGCTGAATTC
	fwd_gamma_2_mCherry	primer	Sorted library	Illumina sequencing index forward primer. "Alpha/Beta/Gamma" refer to the technical replicate. The numbers "1/2/3/4" refer to the bins with none to high expression respectively. "GFP" is for GFP expression, and "mCherry" is for mCherry expression. Unique barcode is written in lowercase at the beginning of the sequence.	gtcaatcttcGCGAATTTTAATTAAGGCTGAATTC
	fwd_gamma_3_mCherry	primer	Sorted library	Illumina sequencing index forward primer. "Alpha/Beta/Gamma" refer to the technical replicate. The numbers "1/2/3/4" refer to the bins with none to high expression respectively. "GFP" is for GFP expression, and "mCherry" is for mCherry expression. Unique barcode is written in lowercase at the beginning of the sequence.	atgacggtaaGCGAATTTTAATTAAGGCTGAATTC
	fwd_gamma_3_mCherry	primer	Sorted library	Illumina sequencing index forward primer. "Alpha/Beta/Gamma" refer to the technical replicate. The numbers "1/2/3/4" refer to the bins with none to high expression respectively. "GFP" is for GFP expression, and "mCherry" is for mCherry expression. Unique barcode is written in lowercase at the beginning of the sequence.	aggctcaaggGCGAATTTTAATTAAGGCTGAATTC
	fwd_alpha_1_GFP	primer	Sorted library	Illumina sequencing index forward primer. "Alpha/Beta/Gamma" refer to the technical replicate. The numbers "1/2/3/4" refer to the bins with none to high expression respectively. "GFP" is for GFP expression, and "mCherry" is for mCherry expression. Unique barcode is written in lowercase at the beginning of the sequence.	gatctcattcGCGAATTTTAATTAAGGCTGAATTC
	fwd_alpha_2_GFP	primer	Sorted library	Illumina sequencing index forward primer. "Alpha/Beta/Gamma" refer to the technical replicate. The numbers "1/2/3/4" refer to the bins with none to high expression respectively. "GFP" is for GFP expression, and "mCherry" is for mCherry expression. Unique barcode is written in lowercase at the beginning of the sequence.	cgcttatcctGCGAATTTTAATTAAGGCTGAATTC
	fwd_alpha_3_GFP	primer	Sorted library	Illumina sequencing index forward primer. "Alpha/Beta/Gamma" refer to the technical replicate. The numbers "1/2/3/4" refer to the bins with none to high expression respectively. "GFP" is for GFP expression, and "mCherry" is for mCherry expression. Unique barcode is written in lowercase at the beginning of the sequence.	tatcatgcagGCGAATTTTAATTAAGGCTGAATTC
	fwd_alpha_4_GFP	primer	Sorted library	Illumina sequencing index forward primer. "Alpha/Beta/Gamma" refer to the technical replicate. The numbers "1/2/3/4" refer to the bins with none to high expression respectively. "GFP" is for GFP expression, and "mCherry" is for mCherry expression. Unique barcode is written in lowercase at the beginning of the sequence.	atctgcgtacGCGAATTTTAATTAAGGCTGAATTC
	fwd_beta_1_GFP	primer	Sorted library	Illumina sequencing index forward primer. "Alpha/Beta/Gamma" refer to the technical replicate. The numbers "1/2/3/4" refer to the bins with none to high expression respectively. "GFP" is for GFP expression, and "mCherry" is for mCherry expression. Unique barcode is written in lowercase at the beginning of the sequence.	gattgcacgcGCGAATTTTAATTAAGGCTGAATTC
	fwd_beta_2_GFP	primer	Sorted library	Illumina sequencing index forward primer. "Alpha/Beta/Gamma" refer to the technical replicate. The numbers "1/2/3/4" refer to the bins with none to high expression respectively. "GFP" is for GFP expression, and "mCherry" is for mCherry expression. Unique barcode is written in lowercase at the beginning of the sequence.	atgcttcctaGCGAATTTTAATTAAGGCTGAATTC
	fwd_beta_3_GFP	primer	Sorted library	Illumina sequencing index forward primer. "Alpha/Beta/Gamma" refer to the technical replicate. The numbers "1/2/3/4" refer to the bins with none to high expression respectively. "GFP" is for GFP expression, and "mCherry" is for mCherry expression. Unique barcode is written in lowercase at the beginning of the sequence.	tgctaacttcGCGAATTTTAATTAAGGCTGAATTC
	fwd_beta_4_GFP	primer	Sorted library	Illumina sequencing index forward primer. "Alpha/Beta/Gamma" refer to the technical replicate. The numbers "1/2/3/4" refer to the bins with none to high expression respectively. "GFP" is for GFP expression, and "mCherry" is for mCherry expression. Unique barcode is written in lowercase at the beginning of the sequence.	atagcagtgcGCGAATTTTAATTAAGGCTGAATTC
	fwd_gamma_1_GFP	primer	Sorted library	Illumina sequencing index forward primer. "Alpha/Beta/Gamma" refer to the technical replicate. The numbers "1/2/3/4" refer to the bins with none to high expression respectively. "GFP" is for GFP expression, and "mCherry" is for mCherry expression. Unique barcode is written in lowercase at the beginning of the sequence.	gagcgagtcaGCGAATTTTAATTAAGGCTGAATTC
	fwd_gamma_2_GFP	primer	Sorted library	Illumina sequencing index forward primer. "Alpha/Beta/Gamma" refer to the technical replicate. The numbers "1/2/3/4" refer to the bins with none to high expression respectively. "GFP" is for GFP expression, and "mCherry" is for mCherry expression. Unique barcode is written in lowercase at the beginning of the sequence.	caggcgatctGCGAATTTTAATTAAGGCTGAATTC
	fwd_gamma_3_GFP	primer	Sorted library	Illumina sequencing index forward primer. "Alpha/Beta/Gamma" refer to the technical replicate. The numbers "1/2/3/4" refer to the bins with none to high expression respectively. "GFP" is for GFP expression, and "mCherry" is for mCherry expression. Unique barcode is written in lowercase at the beginning of the sequence.	ttcacggaagGCGAATTTTAATTAAGGCTGAATTC
	fwd_gamma_4_GFP	primer	Sorted library	Illumina sequencing index forward primer. "Alpha/Beta/Gamma" refer to the technical replicate. The numbers "1/2/3/4" refer to the bins with none to high expression respectively. "GFP" is for GFP expression, and "mCherry" is for mCherry expression. Unique barcode is written in lowercase at the beginning of the sequence.	atcgacggctGCGAATTTTAATTAAGGCTGAATTC
	fwd_library_index	primer	Sorted library	Illumina sequencing index forward primer. "Alpha/Beta/Gamma" refer to the technical replicate. The numbers "1/2/3/4" refer to the bins with none to high expression respectively. "GFP" is for GFP expression, and "mCherry" is for mCherry expression. Unique barcode is written in lowercase at the beginning of the sequence.	gtaaggctccGCGAATTTTAATTAAGGCTGAATTC
	Illumina_reverse_primer	primer	Sorted library	Illumina sequencing reverse primer. Amplify sorted sequences with this primer and one of the forward index primers above.	CGCGATCGCAAGGATCC
Mutation primers for 27 validation constructs	3F_top	primer	P16	"Top" and "Bottom" are complementary primers which contain a targeted mutation predicted to change fluorescence levels. To create the construct, carry out two individual PCRs. 1) Use the respective “Fwd” primer with the respective “Bottom” primer with the wild-type parent sequence for the template. 2) Use the respective “Rev” primer with the respective “Top” primer with the wild-type parent seque…	GCAAAGAGAaGTTTAAACTAAAATCG
	3F_bottom	primer	P16	"Top" and "Bottom" are complementary primers which contain a targeted mutation predicted to change fluorescence levels. To create the construct, carry out two individual PCRs. 1) Use the respective “Fwd” primer with the respective “Bottom” primer with the wild-type parent sequence for the template. 2) Use the respective “Rev” primer with the respective “Top” primer with the wild-type parent seque…	CGATTTTAGTTTAAACtTCTCTTTGC
	S8F_top	primer	P9	"Top" and "Bottom" are complementary primers which contain a targeted mutation predicted to change fluorescence levels. To create the construct, carry out two individual PCRs. 1) Use the respective “Fwd” primer with the respective “Bottom” primer with the wild-type parent sequence for the template. 2) Use the respective “Rev” primer with the respective “Top” primer with the wild-type parent seque…	GGTGCgAAAATAACACATTTAATTTATTG
	S8F_bottom	primer	P9	"Top" and "Bottom" are complementary primers which contain a targeted mutation predicted to change fluorescence levels. To create the construct, carry out two individual PCRs. 1) Use the respective “Fwd” primer with the respective “Bottom” primer with the wild-type parent sequence for the template. 2) Use the respective “Rev” primer with the respective “Top” primer with the wild-type parent seque…	CAATAAATTAAATGTGTTATTTTcGCACC
	3H_top	primer	P1	"Top" and "Bottom" are complementary primers which contain a targeted mutation predicted to change fluorescence levels. To create the construct, carry out two individual PCRs. 1) Use the respective “Fwd” primer with the respective “Bottom” primer with the wild-type parent sequence for the template. 2) Use the respective “Rev” primer with the respective “Top” primer with the wild-type parent seque…	CCTTTTTCATAAATTTCACTCAaTTGTAGGATACAGAAAGC
	3H_bottom	primer	P1	"Top" and "Bottom" are complementary primers which contain a targeted mutation predicted to change fluorescence levels. To create the construct, carry out two individual PCRs. 1) Use the respective “Fwd” primer with the respective “Bottom” primer with the wild-type parent sequence for the template. 2) Use the respective “Rev” primer with the respective “Top” primer with the wild-type parent seque…	GCTTTCTGTATCCTACAAtTGAGTGAAATTTATGAAAAAGG
	S12E_top	primer	P12	"Top" and "Bottom" are complementary primers which contain a targeted mutation predicted to change fluorescence levels. To create the construct, carry out two individual PCRs. 1) Use the respective “Fwd” primer with the respective “Bottom” primer with the wild-type parent sequence for the template. 2) Use the respective “Rev” primer with the respective “Top” primer with the wild-type parent seque…	GTCAATTAATTGCATTTAttAAATATGTTCTG
	S12E_bottom	primer	P12	"Top" and "Bottom" are complementary primers which contain a targeted mutation predicted to change fluorescence levels. To create the construct, carry out two individual PCRs. 1) Use the respective “Fwd” primer with the respective “Bottom” primer with the wild-type parent sequence for the template. 2) Use the respective “Rev” primer with the respective “Top” primer with the wild-type parent seque…	CAGAACATATTTaaTAAATGCAATTAATTGAC
	S12F_top	primer	P12	"Top" and "Bottom" are complementary primers which contain a targeted mutation predicted to change fluorescence levels. To create the construct, carry out two individual PCRs. 1) Use the respective “Fwd” primer with the respective “Bottom” primer with the wild-type parent sequence for the template. 2) Use the respective “Rev” primer with the respective “Top” primer with the wild-type parent seque…	GTATTTAGATGTaATTTAGTTTGTC
	S12F_bottom	primer	P12	"Top" and "Bottom" are complementary primers which contain a targeted mutation predicted to change fluorescence levels. To create the construct, carry out two individual PCRs. 1) Use the respective “Fwd” primer with the respective “Bottom” primer with the wild-type parent sequence for the template. 2) Use the respective “Rev” primer with the respective “Top” primer with the wild-type parent seque…	GACAAACTAAATtACATCTAAATAC
	4D_top	primer	P12	"Top" and "Bottom" are complementary primers which contain a targeted mutation predicted to change fluorescence levels. To create the construct, carry out two individual PCRs. 1) Use the respective “Fwd” primer with the respective “Bottom” primer with the wild-type parent sequence for the template. 2) Use the respective “Rev” primer with the respective “Top” primer with the wild-type parent seque…	CTGTTTTATACATTaTATTTAGATGTG
	4D_bottom	primer	P12	"Top" and "Bottom" are complementary primers which contain a targeted mutation predicted to change fluorescence levels. To create the construct, carry out two individual PCRs. 1) Use the respective “Fwd” primer with the respective “Bottom” primer with the wild-type parent sequence for the template. 2) Use the respective “Rev” primer with the respective “Top” primer with the wild-type parent seque…	CACATCTAAATAtAATGTATAAAACAG
	4G_top	primer	P22	"Top" and "Bottom" are complementary primers which contain a targeted mutation predicted to change fluorescence levels. To create the construct, carry out two individual PCRs. 1) Use the respective “Fwd” primer with the respective “Bottom” primer with the wild-type parent sequence for the template. 2) Use the respective “Rev” primer with the respective “Top” primer with the wild-type parent seque…	CCAACAGTTaTTTTATATTCTCAAAATATG
	4G_bottom	primer	P22	"Top" and "Bottom" are complementary primers which contain a targeted mutation predicted to change fluorescence levels. To create the construct, carry out two individual PCRs. 1) Use the respective “Fwd” primer with the respective “Bottom” primer with the wild-type parent sequence for the template. 2) Use the respective “Rev” primer with the respective “Top” primer with the wild-type parent seque…	CATATTTTGAGAATATAAAAtAACTGTTGG
	S8B_top	primer	P9	"Top" and "Bottom" are complementary primers which contain a targeted mutation predicted to change fluorescence levels. To create the construct, carry out two individual PCRs. 1) Use the respective “Fwd” primer with the respective “Bottom” primer with the wild-type parent sequence for the template. 2) Use the respective “Rev” primer with the respective “Top” primer with the wild-type parent seque…	CTTCTGTTTTTGTTGTTaTAATGTAAATTTGG
	S8B_bottom	primer	P9	"Top" and "Bottom" are complementary primers which contain a targeted mutation predicted to change fluorescence levels. To create the construct, carry out two individual PCRs. 1) Use the respective “Fwd” primer with the respective “Bottom” primer with the wild-type parent sequence for the template. 2) Use the respective “Rev” primer with the respective “Top” primer with the wild-type parent seque…	CCAAATTTACATTAtAACAACAAAAACAGAAG
	S8D_top	primer	P1	"Top" and "Bottom" are complementary primers which contain a targeted mutation predicted to change fluorescence levels. To create the construct, carry out two individual PCRs. 1) Use the respective “Fwd” primer with the respective “Bottom” primer with the wild-type parent sequence for the template. 2) Use the respective “Rev” primer with the respective “Top” primer with the wild-type parent seque…	CCTTTTTCATAAATTaCACTCATTTGTAGG
	S8D_bottom	primer	P1	"Top" and "Bottom" are complementary primers which contain a targeted mutation predicted to change fluorescence levels. To create the construct, carry out two individual PCRs. 1) Use the respective “Fwd” primer with the respective “Bottom” primer with the wild-type parent sequence for the template. 2) Use the respective “Rev” primer with the respective “Top” primer with the wild-type parent seque…	CCTACAAATGAGTGtAATTTATGAAAAAGG
	S8J_top	primer	P8	"Top" and "Bottom" are complementary primers which contain a targeted mutation predicted to change fluorescence levels. To create the construct, carry out two individual PCRs. 1) Use the respective “Fwd” primer with the respective “Bottom” primer with the wild-type parent sequence for the template. 2) Use the respective “Rev” primer with the respective “Top” primer with the wild-type parent seque…	GAATTTAATTCTAATTtAACTAATTGCCTGG
	S8J_bottom	primer	P8	"Top" and "Bottom" are complementary primers which contain a targeted mutation predicted to change fluorescence levels. To create the construct, carry out two individual PCRs. 1) Use the respective “Fwd” primer with the respective “Bottom” primer with the wild-type parent sequence for the template. 2) Use the respective “Rev” primer with the respective “Top” primer with the wild-type parent seque…	CCAGGCAATTAGTTaAATTAGAATTAAATTC
	S8K_top	primer	P8	"Top" and "Bottom" are complementary primers which contain a targeted mutation predicted to change fluorescence levels. To create the construct, carry out two individual PCRs. 1) Use the respective “Fwd” primer with the respective “Bottom” primer with the wild-type parent sequence for the template. 2) Use the respective “Rev” primer with the respective “Top” primer with the wild-type parent seque…	GAATTTAATTCcAATTCAACTAATTGCCTGG
	S8K_bottom	primer	P8	"Top" and "Bottom" are complementary primers which contain a targeted mutation predicted to change fluorescence levels. To create the construct, carry out two individual PCRs. 1) Use the respective “Fwd” primer with the respective “Bottom” primer with the wild-type parent sequence for the template. 2) Use the respective “Rev” primer with the respective “Top” primer with the wild-type parent seque…	CCAGGCAATTAGTTGAATTgGAATTAAATTC
	S8L_top	primer	P8	"Top" and "Bottom" are complementary primers which contain a targeted mutation predicted to change fluorescence levels. To create the construct, carry out two individual PCRs. 1) Use the respective “Fwd” primer with the respective “Bottom” primer with the wild-type parent sequence for the template. 2) Use the respective “Rev” primer with the respective “Top” primer with the wild-type parent seque…	GAATTTAATTCaAATTCAACTAATTGCCTGG
	S8L_bottom	primer	P8	"Top" and "Bottom" are complementary primers which contain a targeted mutation predicted to change fluorescence levels. To create the construct, carry out two individual PCRs. 1) Use the respective “Fwd” primer with the respective “Bottom” primer with the wild-type parent sequence for the template. 2) Use the respective “Rev” primer with the respective “Top” primer with the wild-type parent seque…	CCAGGCAATTAGTTGAATTtGAATTAAATTC
	S8H_top	primer	P3	"Top" and "Bottom" are complementary primers which contain a targeted mutation predicted to change fluorescence levels. To create the construct, carry out two individual PCRs. 1) Use the respective “Fwd” primer with the respective “Bottom” primer with the wild-type parent sequence for the template. 2) Use the respective “Rev” primer with the respective “Top” primer with the wild-type parent seque…	CTTTTGTTACTTATTTCaATACCGTGCAC
	S8H_bottom	primer	P3	"Top" and "Bottom" are complementary primers which contain a targeted mutation predicted to change fluorescence levels. To create the construct, carry out two individual PCRs. 1) Use the respective “Fwd” primer with the respective “Bottom” primer with the wild-type parent sequence for the template. 2) Use the respective “Rev” primer with the respective “Top” primer with the wild-type parent seque…	GTGCACGGTATtGAAATAAGTAACAAAAG
	S9B_top	primer	P6	"Top" and "Bottom" are complementary primers which contain a targeted mutation predicted to change fluorescence levels. To create the construct, carry out two individual PCRs. 1) Use the respective “Fwd” primer with the respective “Bottom” primer with the wild-type parent sequence for the template. 2) Use the respective “Rev” primer with the respective “Top” primer with the wild-type parent seque…	GCCTGTGACTTTCTGAGATTCAaatttgattacGTTAAATTCTAATGTTAAAGAG
	S9B_bottom	primer	P6	"Top" and "Bottom" are complementary primers which contain a targeted mutation predicted to change fluorescence levels. To create the construct, carry out two individual PCRs. 1) Use the respective “Fwd” primer with the respective “Bottom” primer with the wild-type parent sequence for the template. 2) Use the respective “Rev” primer with the respective “Top” primer with the wild-type parent seque…	CTCTTTAACATTAGAATTTAACgtaatcaaattTGAATCTCAGAAAGTCACAGGC
	S9D_top	primer	P12	"Top" and "Bottom" are complementary primers which contain a targeted mutation predicted to change fluorescence levels. To create the construct, carry out two individual PCRs. 1) Use the respective “Fwd” primer with the respective “Bottom” primer with the wild-type parent sequence for the template. 2) Use the respective “Rev” primer with the respective “Top” primer with the wild-type parent seque…	GATGTGATTTAGTTttagcaTTAATTGC
	S9D_bottom	primer	P12	"Top" and "Bottom" are complementary primers which contain a targeted mutation predicted to change fluorescence levels. To create the construct, carry out two individual PCRs. 1) Use the respective “Fwd” primer with the respective “Bottom” primer with the wild-type parent sequence for the template. 2) Use the respective “Rev” primer with the respective “Top” primer with the wild-type parent seque…	GCAATTAAtgctaaAACTAAATCACATC
	S9E_top	primer	P12	"Top" and "Bottom" are complementary primers which contain a targeted mutation predicted to change fluorescence levels. To create the construct, carry out two individual PCRs. 1) Use the respective “Fwd” primer with the respective “Bottom” primer with the wild-type parent sequence for the template. 2) Use the respective “Rev” primer with the respective “Top” primer with the wild-type parent seque…	GGCTGAATTCTGTTTTATACatttgaTTTAGATGTG
	S9E_bottom	primer	P12	"Top" and "Bottom" are complementary primers which contain a targeted mutation predicted to change fluorescence levels. To create the construct, carry out two individual PCRs. 1) Use the respective “Fwd” primer with the respective “Bottom” primer with the wild-type parent sequence for the template. 2) Use the respective “Rev” primer with the respective “Top” primer with the wild-type parent seque…	CACATCTAAAtcaaatGTATAAAACAGAATTCAGCC
	S9G35_top	primer	P13	"Top" and "Bottom" are complementary primers which contain a targeted mutation predicted to change fluorescence levels. To create the construct, carry out two individual PCRs. 1) Use the respective “Fwd” primer with the respective “Bottom” primer with the wild-type parent sequence for the template. 2) Use the respective “Rev” primer with the respective “Top” primer with the wild-type parent seque…	CGAAAACACttaagaAAAACTCATCCC
	S9G35_bottom	primer	P13	"Top" and "Bottom" are complementary primers which contain a targeted mutation predicted to change fluorescence levels. To create the construct, carry out two individual PCRs. 1) Use the respective “Fwd” primer with the respective “Bottom” primer with the wild-type parent sequence for the template. 2) Use the respective “Rev” primer with the respective “Top” primer with the wild-type parent seque…	GGGATGAGTTTTtcttaaGTGTTTTCG
	S9G10_top	primer	P13	"Top" and "Bottom" are complementary primers which contain a targeted mutation predicted to change fluorescence levels. To create the construct, carry out two individual PCRs. 1) Use the respective “Fwd” primer with the respective “Bottom” primer with the wild-type parent sequence for the template. 2) Use the respective “Rev” primer with the respective “Top” primer with the wild-type parent seque…	GGCTGAATTCTTGCATTACTattccaTATAACG
	S9G10_bottom	primer	P13	"Top" and "Bottom" are complementary primers which contain a targeted mutation predicted to change fluorescence levels. To create the construct, carry out two individual PCRs. 1) Use the respective “Fwd” primer with the respective “Bottom” primer with the wild-type parent sequence for the template. 2) Use the respective “Rev” primer with the respective “Top” primer with the wild-type parent seque…	CGTTATAtggaatAGTAATGCAAGAATTCAGCC
	S9I35_top	primer	P22	"Top" and "Bottom" are complementary primers which contain a targeted mutation predicted to change fluorescence levels. To create the construct, carry out two individual PCRs. 1) Use the respective “Fwd” primer with the respective “Bottom” primer with the wild-type parent sequence for the template. 2) Use the respective “Rev” primer with the respective “Top” primer with the wild-type parent seque…	GCAATGAAATAATATATTCCAACAGttttgtTATATTCTC
	S9I35_bottom	primer	P22	"Top" and "Bottom" are complementary primers which contain a targeted mutation predicted to change fluorescence levels. To create the construct, carry out two individual PCRs. 1) Use the respective “Fwd” primer with the respective “Bottom” primer with the wild-type parent sequence for the template. 2) Use the respective “Rev” primer with the respective “Top” primer with the wild-type parent seque…	GAGAATATAacaaaaCTGTTGGAATATATTATTTCATTGC
	S9I10_top	primer	P22	"Top" and "Bottom" are complementary primers which contain a targeted mutation predicted to change fluorescence levels. To create the construct, carry out two individual PCRs. 1) Use the respective “Fwd” primer with the respective “Bottom” primer with the wild-type parent sequence for the template. 2) Use the respective “Rev” primer with the respective “Top” primer with the wild-type parent seque…	CCAACAGTTGTTTTATATTCTCAAAAtgagatttgatTGCGCCC
	S9I10_bottom	primer	P22	"Top" and "Bottom" are complementary primers which contain a targeted mutation predicted to change fluorescence levels. To create the construct, carry out two individual PCRs. 1) Use the respective “Fwd” primer with the respective “Bottom” primer with the wild-type parent sequence for the template. 2) Use the respective “Rev” primer with the respective “Top” primer with the wild-type parent seque…	GGGCGCAatcaaatctcaTTTTGAGAATATAAAACAACTGTTGG
	S10A_top	primer	P19	"Top" and "Bottom" are complementary primers which contain a targeted mutation predicted to change fluorescence levels. To create the construct, carry out two individual PCRs. 1) Use the respective “Fwd” primer with the respective “Bottom” primer with the wild-type parent sequence for the template. 2) Use the respective “Rev” primer with the respective “Top” primer with the wild-type parent seque…	GTACTTTTAAAACAATGtACTATATTATGGGG
	S10A_bottom	primer	P19	"Top" and "Bottom" are complementary primers which contain a targeted mutation predicted to change fluorescence levels. To create the construct, carry out two individual PCRs. 1) Use the respective “Fwd” primer with the respective “Bottom” primer with the wild-type parent sequence for the template. 2) Use the respective “Rev” primer with the respective “Top” primer with the wild-type parent seque…	CCCCATAATATAGTaCATTGTTTTAAAAGTAC
	S10B_top	primer	P13	"Top" and "Bottom" are complementary primers which contain a targeted mutation predicted to change fluorescence levels. To create the construct, carry out two individual PCRs. 1) Use the respective “Fwd” primer with the respective “Bottom” primer with the wild-type parent sequence for the template. 2) Use the respective “Rev” primer with the respective “Top” primer with the wild-type parent seque…	CGAAAACACAAATaTAAAACTCATCCC
	S10B_bottom	primer	P13	"Top" and "Bottom" are complementary primers which contain a targeted mutation predicted to change fluorescence levels. To create the construct, carry out two individual PCRs. 1) Use the respective “Fwd” primer with the respective “Bottom” primer with the wild-type parent sequence for the template. 2) Use the respective “Rev” primer with the respective “Top” primer with the wild-type parent seque…	GGGATGAGTTTTAtATTTGTGTTTTCG
	S10C_top	primer	P13	"Top" and "Bottom" are complementary primers which contain a targeted mutation predicted to change fluorescence levels. To create the construct, carry out two individual PCRs. 1) Use the respective “Fwd” primer with the respective “Bottom” primer with the wild-type parent sequence for the template. 2) Use the respective “Rev” primer with the respective “Top” primer with the wild-type parent seque…	CGAAAACACAAATGcAAAACTCATCCC
	S10C_bottom	primer	P13	"Top" and "Bottom" are complementary primers which contain a targeted mutation predicted to change fluorescence levels. To create the construct, carry out two individual PCRs. 1) Use the respective “Fwd” primer with the respective “Bottom” primer with the wild-type parent sequence for the template. 2) Use the respective “Rev” primer with the respective “Top” primer with the wild-type parent seque…	GGGATGAGTTTTgCATTTGTGTTTTCG
	S10D_top	primer	P13	"Top" and "Bottom" are complementary primers which contain a targeted mutation predicted to change fluorescence levels. To create the construct, carry out two individual PCRs. 1) Use the respective “Fwd” primer with the respective “Bottom” primer with the wild-type parent sequence for the template. 2) Use the respective “Rev” primer with the respective “Top” primer with the wild-type parent seque…	GCATTACTACCTaATATAACG
	S10D_bottom	primer	P13	"Top" and "Bottom" are complementary primers which contain a targeted mutation predicted to change fluorescence levels. To create the construct, carry out two individual PCRs. 1) Use the respective “Fwd” primer with the respective “Bottom” primer with the wild-type parent sequence for the template. 2) Use the respective “Rev” primer with the respective “Top” primer with the wild-type parent seque…	CGTTATATtAGGTAGTAATGC
	S10E_top	primer	P6	"Top" and "Bottom" are complementary primers which contain a targeted mutation predicted to change fluorescence levels. To create the construct, carry out two individual PCRs. 1) Use the respective “Fwd” primer with the respective “Bottom” primer with the wild-type parent sequence for the template. 2) Use the respective “Rev” primer with the respective “Top” primer with the wild-type parent seque…	CGTTAAATTCTAATaTTAAAGAGAACTCTTTTTTCC
	S10E_bottom	primer	P6	"Top" and "Bottom" are complementary primers which contain a targeted mutation predicted to change fluorescence levels. To create the construct, carry out two individual PCRs. 1) Use the respective “Fwd” primer with the respective “Bottom” primer with the wild-type parent sequence for the template. 2) Use the respective “Rev” primer with the respective “Top” primer with the wild-type parent seque…	GGAAAAAAGAGTTCTCTTTAAtATTAGAATTTAACG
	S10F_top	primer	P6	"Top" and "Bottom" are complementary primers which contain a targeted mutation predicted to change fluorescence levels. To create the construct, carry out two individual PCRs. 1) Use the respective “Fwd” primer with the respective “Bottom” primer with the wild-type parent sequence for the template. 2) Use the respective “Rev” primer with the respective “Top” primer with the wild-type parent seque…	CGTTAAATTCTAATGTaAAAGAGAACTCTTTTTTCC
	S10F_bottom	primer	P6	"Top" and "Bottom" are complementary primers which contain a targeted mutation predicted to change fluorescence levels. To create the construct, carry out two individual PCRs. 1) Use the respective “Fwd” primer with the respective “Bottom” primer with the wild-type parent sequence for the template. 2) Use the respective “Rev” primer with the respective “Top” primer with the wild-type parent seque…	GGAAAAAAGAGTTCTCTTTtACATTAGAATTTAACG
	S10G_top	primer	P6	"Top" and "Bottom" are complementary primers which contain a targeted mutation predicted to change fluorescence levels. To create the construct, carry out two individual PCRs. 1) Use the respective “Fwd” primer with the respective “Bottom” primer with the wild-type parent sequence for the template. 2) Use the respective “Rev” primer with the respective “Top” primer with the wild-type parent seque…	CTTTCTGAGATTCAATTAaAGTATCGTTAAATTC
	S10G_bottom	primer	P6	"Top" and "Bottom" are complementary primers which contain a targeted mutation predicted to change fluorescence levels. To create the construct, carry out two individual PCRs. 1) Use the respective “Fwd” primer with the respective “Bottom” primer with the wild-type parent sequence for the template. 2) Use the respective “Rev” primer with the respective “Top” primer with the wild-type parent seque…	GAATTTAACGATACTtTAATTGAATCTCAGAAAG

## Sheet: 25 Promoter Islands
Template	Sequence (5'-3')
P1	tacgccagaaagtattttagcctttttcataaatttcactcatttgtaggatacagaaagcaatacaaagcccgcataaacaattagcatttatgttgtgtaatatttttttgccaggcttatagtgtctttggcaaccggtagctgtat
P2	ttacttattccaattcgttactataaatatggcaaaaatattacaacaaacagcggttaaaaaatttggtgaagattttttgtaataatcctaattagttatgggaatttcgcttgatgtatctgcataacaaaaacaatatgcgccatt
P3	gaaaaataatttcttgcgttattttcggcaccttttatgtagcgaaggtgccggaatatattctcttttgttacttatttctataccgtgcacaatatttttatccctcatatttatagggtaaattacctgtaaagtagtgtctaatta
P4	tctcaatatgtagaatgaatttaaattcgttttaattgaattaaaaatcacaaaattggtaagtgaatcggttcaattcggatttttatagtttaataatcgttaaaaaactcctttcctacgtaaagtctacatttgtgcatagttaca
P5	tacataaggtaaaaaaagcacattatgcaaaattcattatctaattgaaaaaactagaattaacgataaataaccgtatttttaattcttttttgttattaaaattcacatttttaacacttagtatcaactgaaacagttagcgcggta
P6	cctcaagaatatgctttgccttattgcctgtgactttctgagattcaattatagtatcgttaaattctaatgttaaagagaactcttttttccgctttgtgtaagtttaaccttatattgattaccaatatcaaataaaaaggtcctgta
P7	attgatagattaaaaattgcatagttcttattttatttaaatatgaactatgagttattgttgcttaataagaaaactgtttctttcaataggaaaattatcatcatcatatttaacaaagaatagcactaattgctaaaaatcgaagtt
P8	atcatttattgaaagtataatccaaatagaatttaattctaattcaactaattgcctggagaagttatgtaatgaagttagtattctttttaagaatcaacctgattatcttacttttttaagagcaatggatggattcgaagttaatgg
P9	ttatggtgcaaaaataacacatttaatttattgattataaagggctttaatttttggcccttttatttttggtgttatgtttttaaattgtctataagtgccaaaaattacatgttttgtcttctgtttttgttgttttaatgtaaattt
P10	cgcaggcatatattgaactcttaaacgataattcagaagataatggctaagcattacaatcatttggttaaatttgctggttatagtgcagttaaccactataaccagcacctcttatgttttcttaaatcagcatcttaaaacagttaa
P11	ttttggtgttgttatattttttatcttgtacttttttttcaggtactgaatcatttttaattcataatctgcaacccaatttataaaataaatagtcataataaagttagttccagtacatactaataaatatttttataatcctttgcg
P12	tgttttatacattgtatttagatgtgatttagtttgtcaattaattgcatttaaaaaatatgttctgtgaacaagcattgtttatatacattatgtgaatgtaatatgcgagtgattgagaatgatacagtgatatatacaatgcgaata
P13	ttgcattactaccttatataacgaaaacacaaatgtaaaactcatcccacagatgaattacctgatggttgttgtggctttgtttttccttaacgccgtcatttttcttttcatgttaatgaaatatttcactaacaaacaaattttacc
P14	cgttgaaggcatgatgaataaatataacagaacaaacgagcgacattttatctccttaaaacaataaagtttttatcgatacttttttaacatttcatatttataatttgctgtttgttttcagccttgcaaactattgataatgaaatg
P15	acgttttggaatttttttcggtggcaaaaatggggcaaaacgctgcaaaaggggcaaaaaaggggcaaaaaaagagtggattatcgtagcttattgttgtcgctgatgatatttaacacattgaaaaataagtaaaatacttatgagtca
P16	attatttccgcaaagagatgtttaaactaaaatcgtaattaaggaaagagatgagatatgattttcagaaaatatttatattcgcaatataaataaattaccatttgtttaatttgtcaaatgctcttgtatgtaagatttgacgcaaca
P17	attaattgatgttattgtaagtgtgattcttaattatcataataaacattaagttaaccatatccatacaaaatacaatggtttatgttcttcaaaataaataaacaaaatcattcataaatttacacatcacttaaaatctcctgtttc
P18	taattataatattatacagcgttttttttgatgtgatattctggaaccattaatttgtaattgggttgctgtcgcctattttatacatactataattgatggttttctatgtgatttagttaataaccttctgggtttattttaagggtt
P19	gcttatcaaatcattaccagaatataataccataatattgattattagcactttataatcattgaataaaaatagattttatgtacttttaaaacaatgcactatattatggggtgatggatattcatgtcacgccccaaaattaactga
P20	aaaccagaacaccattaacgcatgattaaccacccatagcaaggattacttttgtaaagaaaaacacagcaatgaaagaatagctttatttattaataaaacgtgtcattctgattaagaccttttatcttacccttaagatttcaggaa
P21	aacgatttcctttacgatactatcactaccctttttttacacacaaatattaccgggtggagataaaagggaaatcaaaggtaattatatcaggaagatataacgcattacatttattgtgtgtagaagaaaatccattcctgttctaat
P22	aggctatattacctcttcccttatttgttatttattttaacgtttcattgatatataaatccaaatgaaaatcgttatcaataaagcaatgaaataatatattccaacagttgttttatattctcaaaatatgttaaggttgcgccctca
P23	tgtttgctgtaattatctgattttgttttctttgtatgtgatggacttgtgacagagtggttatcgttaatcaggcaaagagggaaaaacatattatttaaaccattatagcgcataaaatatccttataattaacaagaaagaaaaggc
P24	ttgattcaattgatagctatgagtatataagttcatatagttatattttgtatacatacgtcctgtttattagcatttttactgaatatcttgatgctagggtgttatcgttatttctaaaagtaatatatatttattcattatatgcga
P25	attactaattggaatttgatgttgctatattgaggtctatattaataatgcctgtgaatggtatttttgatgtatttgatatgttatcaatttatattatttacaaactaattgtttcaaataatacatggctgattatgcggaaataaa

## Sheet: 27 validation constructs
Figure	Panel	Template	Sequence (5'-3', targeted mutations in lowercase)
3	F	P16	ATTATTTCCGCAAAGAGAaGTTTAAACTAAAATCGTAATTAAGGAAAGAGATGAGATATGATTTTCAGAAAATATTTATATTCGCAATATAAATAAATTACCATTTGTTTAATTTGTCAAATGCTCTTGTATGTAAGATTTGACGCAACA
3 supplement 2	F	P9	TTATGGTGCgAAAATAACACATTTAATTTATTGATTATAAAGGGCTTTAATTTTTGGCCCTTTTATTTTTGGTGTTATGTTTTTAAATTGTCTATAAGTGCCAAAAATTACATGTTTTGTCTTCTGTTTTTGTTGTTTTAATGTAAATTT
3	H	P1	TACGCCAGAAAGTATTTTAGCCTTTTTCATAAATTTCACTCAaTTGTAGGATACAGAAAGCAATACAAAGCCCGCATAAACAATTAGCATTTATGTTGTGTAATATTTTTTTGCCAGGCTTATAGTGTCTTTGGCAACCGGTAGCTGTAT
5 supplement 1	E	P12	TGTTTTATACATTGTATTTAGATGTGATTTAGTTTGTCAATTAATTGCATTTAttAAATATGTTCTGTGAACAAGCATTGTTTATATACATTATGTGAATGTAATATGCGAGTGATTGAGAATGATACAGTGATATATACAATGCGAATA
5 supplement 1	F	P12	TGTTTTATACATTGTATTTAGATGTaATTTAGTTTGTCAATTAATTGCATTTAAAAAATATGTTCTGTGAACAAGCATTGTTTATATACATTATGTGAATGTAATATGCGAGTGATTGAGAATGATACAGTGATATATACAATGCGAATA
4	D	P12	TGTTTTATACATTaTATTTAGATGTGATTTAGTTTGTCAATTAATTGCATTTAAAAAATATGTTCTGTGAACAAGCATTGTTTATATACATTATGTGAATGTAATATGCGAGTGATTGAGAATGATACAGTGATATATACAATGCGAATA
4	G	P22	AGGCTATATTACCTCTTCCCTTATTTGTTATTTATTTTAACGTTTCATTGATATATAAATCCAAATGAAAATCGTTATCAATAAAGCAATGAAATAATATATTCCAACAGTTaTTTTATATTCTCAAAATATGTTAAGGTTGCGCCCTCA
3 supplement 2	B	P9	TTATGGTGCAAAAATAACACATTTAATTTATTGATTATAAAGGGCTTTAATTTTTGGCCCTTTTATTTTTGGTGTTATGTTTTTAAATTGTCTATAAGTGCCAAAAATTACATGTTTTGTCTTCTGTTTTTGTTGTTaTAATGTAAATTT
3 supplement 2	D	P1	TACGCCAGAAAGTATTTTAGCCTTTTTCATAAATTaCACTCATTTGTAGGATACAGAAAGCAATACAAAGCCCGCATAAACAATTAGCATTTATGTTGTGTAATATTTTTTTGCCAGGCTTATAGTGTCTTTGGCAACCGGTAGCTGTAT
3 supplement 2	J	P8	ATCATTTATTGAAAGTATAATCCAAATAGAATTTAATTCTAATTtAACTAATTGCCTGGAGAAGTTATGTAATGAAGTTAGTATTCTTTTTAAGAATCAACCTGATTATCTTACTTTTTTAAGAGCAATGGATGGATTCGAAGTTAATGG
3 supplement 2	K	P8	ATCATTTATTGAAAGTATAATCCAAATAGAATTTAATTCcAATTCAACTAATTGCCTGGAGAAGTTATGTAATGAAGTTAGTATTCTTTTTAAGAATCAACCTGATTATCTTACTTTTTTAAGAGCAATGGATGGATTCGAAGTTAATGG
3 supplement 2	L	P8	ATCATTTATTGAAAGTATAATCCAAATAGAATTTAATTCaAATTCAACTAATTGCCTGGAGAAGTTATGTAATGAAGTTAGTATTCTTTTTAAGAATCAACCTGATTATCTTACTTTTTTAAGAGCAATGGATGGATTCGAAGTTAATGG
3 supplement 2	H	P3	GAAAAATAATTTCTTGCGTTATTTTCGGCACCTTTTATGTAGCGAAGGTGCCGGAATATATTCTCTTTTGTTACTTATTTCaATACCGTGCACAATATTTTTATCCCTCATATTTATAGGGTAAATTACCTGTAAAGTAGTGTCTAATTA
4 supplement 1	B	P6	CCTCAAGAATATGCTTTGCCTTATTGCCTGTGACTTTCTGAGATTCAaatttgattacGTTAAATTCTAATGTTAAAGAGAACTCTTTTTTCCGCTTTGTGTAAGTTTAACCTTATATTGATTACCAATATCAAATAAAAAGGTCCTGTA
4 supplement 1	D	P12	TGTTTTATACATTGTATTTAGATGTGATTTAGTTttagcaTTAATTGCATTTAAAAAATATGTTCTGTGAACAAGCATTGTTTATATACATTATGTGAATGTAATATGCGAGTGATTGAGAATGATACAGTGATATATACAATGCGAATA
4 supplement 1	E	P12	TGTTTTATACatttgaTTTAGATGTGATTTAGTTTGTCAATTAATTGCATTTAAAAAATATGTTCTGTGAACAAGCATTGTTTATATACATTATGTGAATGTAATATGCGAGTGATTGAGAATGATACAGTGATATATACAATGCGAATA
4 supplement 1	G (minus 35)	P13	TTGCATTACTACCTTATATAACGAAAACACttaagaAAAACTCATCCCACAGATGAATTACCTGATGGTTGTTGTGGCTTTGTTTTTCCTTAACGCCGTCATTTTTCTTTTCATGTTAATGAAATATTTCACTAACAAACAAATTTTACC
4 supplement 1	G (minus 10)	P13	TTGCATTACTattccaTATAACGAAAACACAAATGTAAAACTCATCCCACAGATGAATTACCTGATGGTTGTTGTGGCTTTGTTTTTCCTTAACGCCGTCATTTTTCTTTTCATGTTAATGAAATATTTCACTAACAAACAAATTTTACC
4 supplement 1	I (minus 35)	P22	AGGCTATATTACCTCTTCCCTTATTTGTTATTTATTTTAACGTTTCATTGATATATAAATCCAAATGAAAATCGTTATCAATAAAGCAATGAAATAATATATTCCAACAGttttgtTATATTCTCAAAATATGTTAAGGTTGCGCCCTCA
4 supplement 1	I (minus 10)	P22	AGGCTATATTACCTCTTCCCTTATTTGTTATTTATTTTAACGTTTCATTGATATATAAATCCAAATGAAAATCGTTATCAATAAAGCAATGAAATAATATATTCCAACAGTTGTTTTATATTCTCAAAAtgagatttgatTGCGCCCTCA
4 supplement 2	A	P19	GCTTATCAAATCATTACCAGAATATAATACCATAATATTGATTATTAGCACTTTATAATCATTGAATAAAAATAGATTTTATGTACTTTTAAAACAATGtACTATATTATGGGGTGATGGATATTCATGTCACGCCCCAAAATTAACTGA
4 supplement 2	B	P13	TTGCATTACTACCTTATATAACGAAAACACAAATaTAAAACTCATCCCACAGATGAATTACCTGATGGTTGTTGTGGCTTTGTTTTTCCTTAACGCCGTCATTTTTCTTTTCATGTTAATGAAATATTTCACTAACAAACAAATTTTACC
4 supplement 2	C	P13	TTGCATTACTACCTTATATAACGAAAACACAAATGcAAAACTCATCCCACAGATGAATTACCTGATGGTTGTTGTGGCTTTGTTTTTCCTTAACGCCGTCATTTTTCTTTTCATGTTAATGAAATATTTCACTAACAAACAAATTTTACC
4 supplement 2	D	P13	TTGCATTACTACCTaATATAACGAAAACACAAATGTAAAACTCATCCCACAGATGAATTACCTGATGGTTGTTGTGGCTTTGTTTTTCCTTAACGCCGTCATTTTTCTTTTCATGTTAATGAAATATTTCACTAACAAACAAATTTTACC
4 supplement 2	E	P6	CCTCAAGAATATGCTTTGCCTTATTGCCTGTGACTTTCTGAGATTCAATTATAGTATCGTTAAATTCTAATaTTAAAGAGAACTCTTTTTTCCGCTTTGTGTAAGTTTAACCTTATATTGATTACCAATATCAAATAAAAAGGTCCTGTA
4 supplement 2	F	P6	CCTCAAGAATATGCTTTGCCTTATTGCCTGTGACTTTCTGAGATTCAATTATAGTATCGTTAAATTCTAATGTaAAAGAGAACTCTTTTTTCCGCTTTGTGTAAGTTTAACCTTATATTGATTACCAATATCAAATAAAAAGGTCCTGTA
4 supplement 2	G	P6	CCTCAAGAATATGCTTTGCCTTATTGCCTGTGACTTTCTGAGATTCAATTAaAGTATCGTTAAATTCTAATGTTAAAGAGAACTCTTTTTTCCGCTTTGTGTAAGTTTAACCTTATATTGATTACCAATATCAAATAAAAAGGTCCTGTA
