# Supplementary material for: The emergence and evolution of gene expression in genome regions replete with regulatory motifs
Source: eLife. 2024 Dec 20;13:RP98654. doi: 10.7554/eLife.98654 (PMC11661796; doi:10.7554/eLife.98654)
Supplement: Source data 5. [file elife-98654-data5.xlsx]

## Sheet: Fig_1
A	Minus 35 Position Frequency Matrix							D	Probability of emergence							Parent fluorescence score	Pnew										number of -10 boxes	number of -35 boxes	pnew
																1.47346	0.0935734										5	5	0.0935734
A	0.02	0	0.06	0.53	0.47	0.58			0.0935734							1.19452	0.0608423										1	4	0.0608423
C	0	0	0.03	0.28	0.35	0.04			0.118646							1.1987	0.0462416										7	5	0.0462416
G	0	0	0.79	0.02	0.03	0.07			0.0608423							1.13497	0.0327217										5	12	0.0327217
T	0.97	0.99	0.13	0.16	0.15	0.31			0.0166026							1.11754	0.0607957										4	8	0.0607957
	T	T	G	A	A	A			0.0462416							1.18339	0.0606659										8	5	0.0606659
									0.0259734							1.10972	0.0197798										4	12	0.0197798
									0.0327217							1.09596	0.0464182										6	6	0.0464182
	Minus 10 Position Frequency Matrix								0.00261298							1.49408	0.248776										8	14	0.248776
									0.0607957							1.15692	0.0485277										6	5	0.0485277
A	0	0.99	0.32	0.6	0.52	0.01			0.0167316							1.13174	0.0486441										8	8	0.0486441
C	0	0	0.1	0.07	0.21	0			0.0606659							1.03121	0.0434635										5	10	0.0434635
G	0.06	0	0.04	0.06	0.14	0			0.0197798							1.18518	0.0460094										0	6	0.0460094
T	0.93	0	0.54	0.27	0.12	0.99			0.0091435							1.20695	0.0510917										6	13	0.0510917
	T	A	T	A	A	T			0.0464182							1.17738	0.0706534										4	4	0.0706534
									0.410176							1.19084	0.078585										8	9	0.078585
		To make the logos, copy the respective column and paste it as an input into the Weblogo web portal: https://weblogo.berkeley.edu/logo.cgi							0.248776							1.08958	0.0326005										5	5	0.0326005
		Minus 35 instances	Minus 10 instances						0.0026372							1.05413	0.0489663										10	9	0.0489663
		TTGCCA	TAAACT						0.0485277							3.70223	0.530671										5	3	0.0530361
		ATGCAA	TAAACT						0.00526402							2.88377	0.915978										5	4	0.0596639
		TTGTCA	TATGAT						0.0486441							1.19806	0.0530361										7	8	0.0668498
		TTGTTA	TATAAT						0.00711864							2.63999	0.702966										6	12	0.0693959
		TTAAAT	TATAAT						0.0434635							1.14487	0.0596639										2	5	0.118646
		TTAAAA	TATCAT						0.0460094							1.08328	0.0668498										5	8	0.0166026
		TTGACA	TAAATT						0.0510917							1.18347	0.0693959										5	1	0.0259734
		TTGATA	TATTTT						0.00676856							1.24661	0.118646										4	9	0.00261298
		TTGCAT	GATTAT						0.0706534							1.01867	0.0166026										4	9	0.0167316
		TTGACA	TACAAT						0.00923574							1.0169	0.0259734										6	8	0.0091435
		TTGCCA	TACGCT						0.078585							1.00581	0.00261298										6	7	0.410176
		TTGCAA	GATAAT						0.243352							1.01573	0.0167316										5	8	0.0026372
		TTTACT	TAAAGT						0.0326005							1.78423	0.718209										4	4	0.00526402
		TTGAAG	TAGTAT						0.00682335							1.00537	0.0091435										6	7	0.00711864
		TTGCCA	TATAGT						0.0489663							1.38006	0.410176										3	8	0.00676856
		TTCAAA	TATCAT						0.0530361							1.00528	0.0026372										4	9	0.00923574
		TTGCCA	TAAAAT						0.0156128							1.013	0.00526402										4	6	0.243352
		TTGATT	TATTGT						0.0596639							1.01287	0.00711864										10	10	0.00682335
		TTTAAA	TAAAAT						0.00378151							3.13652	0.969949										6	12	0.0156128
		TTGCGT	TATTAT						0.0668498							1.72999	0.568075										4	5	0.00378151
		TTCCCA	TATAGT						0.00457875							1.00858	0.00676856										3	1	0.00457875
		TTGTCA	TAAACT						0.0693959							1.01857	0.00923574										5	6	0.001997
		TTGCAT	TAAAAT						0.001997							1.39465	0.243352
		TTGCAT	TATATT													1.00442	0.00682335
		TTGCAT	TATTGT													1.54454	0.620511
		TTTCAT	TATAAT													1.53483	0.603299
		TTGATA	TAAAAT													3.61863	0.987792
		TTGAAA	TAATGT													1.95968	0.832821
		TTTAAA	TATAAT													1.0228	0.0156128
		TTTACA	TAAAGT													1.00796	0.00378151
		TTGACT	TACAAT													1.01636	0.00457875
		TTGAAC	TAAATT													1.00909	0.001997
		TTGCAA	TATTAT
		TTGATT	TATTAT
		TTTATT	TATATT
		TTGCAA	GACAAT
		TTGTAT	TATCAT
		TTTACC	TATACT
		TTGACA	TAATGT
		TTGCAA	TATTGT
		TTGCCT	TAAGCT
		TTGTAA	TATTCT
		TTGTAA	TATTCT
		TTGTAA	TATTCT
		TTGAAA	TACTAT
		TTGAAA	TATATT
		TTGATA	TAAATT
		TTGTCT	TAGACT
		TTGACG	TAAAAT
		TTGACA	TAGTCT
		TTGTCA	TAAGAT
		TTGACA	TAATAT
		TTAAAT	TAATAT
		TTGAAA	TATTGT
		TTGCCG	TAAGAT
		TTGCTA	TATAAT
		TTACAT	TAAAAT
		TTGAAG	TAGAAT
		TTGACC	TAATCT
		TTCACA	TACACT
		TTGAAA	TAAATT
		TTGCTA	TATAAT
		TTGGAT	TAAAAT
		TTGCAT	TAAAGT
		TTGAAA	GATAAT
		TTTATT	TAAAAT
		TTGAAT	TATATT
		TTGCGA	TATAAT
		TTTATA	TATAAT
		TTGTCC	TAAAAT
		TTGCAA	TAATAT
		TTGCCT	TATAAA
		TTGAAT	TATCAT
		TTGTTT	TAAAAT
		TTGAAA	TAGTAT
		TTGACG	TATGAT
		TTTCAA	TACACT
		TTATAA	TATAAT
		TTTACA	TATAAT
		TTGAAT	TACAAT
		TTGATA	TATATT
		TTGTAT	TAAAAT
		TTGAAA	TATTGT
		TTGACT	TATATT
		TTGCAA	TATAGT
		TTGATA	TAATAT
		TTGCCA	TACTAT
		TTGTCA	TAAAGT
		TTGCTT	TATTAT
		TTGACA	TATGAT
		TTTAAT	TAATAT
		TTGTCA	TATACT
		TTGTAT	TATTGT
		ATGAAG	TATAAT
		TTGCAT	TATAAT
		TTGGAG	TATACT
		TTGAAA	TATCAT
		TTGATT	TACGCT
		TTAAGA	TATAAT
		TTGTCA	TAAAAT
		TTGACC	TATAAT
		TTGAAA	TATCAT
		ATGACT	TATACT
		TTGTCT	TATAGT
		TTGCAG	TATCCT
		TTGCCA	TACACT
		TTGCCA	GATAAT
		TTGTAA	TAAATT
		TTTAAA	TATTGT
		TTTACA	TACACT
		TTGAGA	TAAAAT
		TTGACT	TACTTT
		TTTACT	TATTCT
		TTGAAT	TATAAT
		TTGAAA	TATCCT
		TTGCCT	TAAATT
		TTGTAA	TATTAT
		TTGGAA	TATACT
		TTAAAA	TATATT
		TTGATT	TACACT
		TTGTCA	TAAACT
		TTGCTT	TAAACT
		TTGCAA	TAATAT
		TTGTCA	TATAAT
		TTGAAA	TAATAT
		TTGAAA	TAGCAT
		TTGCCA	GATTAT
		TTGTTA	TATTCT
		TTAACA	TAAAAT
		TTGATA	TATTTT
		TTGCCA	GATAAT
		TTGCTT	TAAAAT
		TTTACT	TATAAT
		TTGAAG	TATACT
		TTGAAT	TATATT
		TTTACA	TATAAT
		TTGAAT	TATTCT
		TTGCAG	TATACT
		TTGAAA	GATAAT
		TTCAAA	TAAAAT
		TTGAAA	TACCGT
		TTTAAT	TAAAGT
		TTGATA	GATATT
		TTGCCA	TATTGT
		TTGCCT	TAAAAT

## Sheet: Fig_2
PI59	PI19	PI11			Inactive	Inactive scrambled	Active	Active scrambled
-0.000940715	0.000633116	-0.00438521		10 only	5	3	9	8
-0.000925073	0.000323765	-0.00394529		35 only	11	4	9	3
-0.000715858	-2.6012e-05	-0.0026444		10 and 35	6	1	5	2
-0.000424946	-2.18185e-05	-0.00194492		none	12	26	11	21
-0.00058847	0.000331789	-0.00252676		total	34	34	34	34
-0.00145321	0.000621337	-0.00310531
-0.00161953	0.000153208	-0.00407331
-0.00110984	-0.000186575	-0.00487894
-0.000947562	-0.000119379	-0.00505747
-0.0014899	-0.000214097	-0.0050427
-0.00192562	-0.00039928	-0.00493477
-0.00135387	-0.000409692	-0.00468829
-0.000303421	-0.000401723	-0.00458015
-2.08442e-06	-0.000479379	-0.00448551
-0.000290218	-0.000476038	-0.00371511
-0.0003446	-0.000492244	-0.00309941
0.000511152	-0.000599397	-0.00379271
0.000774116	-0.000680382	-0.0045233
0.00118368	-0.000672183	-0.00483789
0.00350742	-0.000653999	-0.00489822
0.00638699	-0.000667859	-0.0044382
0.00611884	-0.000667962	-0.00365939
0.00262844	-0.000633057	-0.00333465
0.000704679	-0.000600318	-0.00346814
0.00182049	-0.000606458	-0.00360103
0.00362059	-0.00064705	-0.00363082
0.0034347	-0.000641618	-0.00385514
0.00160282	-0.000562978	-0.00379749
0.000205615	-0.000552038	-0.00200713
-0.000157076	-0.000550624	0.00370247
-0.000304224	-0.000465387	0.00796187
-0.0007503	-0.000398283	0.00304229
-0.00134591	-0.000448474	-0.00268325
-0.0012348	-0.000579268	-0.0042261
-0.000461932	-0.000655773	-0.00430993
-0.000101428	-0.000458931	-0.00399978
-0.000303626	0.000274707	-0.00341942
-0.000846399	0.00088875	-0.00255809
-0.00152383	0.000281055	-0.00134216
-0.00140457	-0.000501479	-0.00060263
-0.00117063	-0.000736539	-0.00210772
-0.00168624	-0.000731123	-0.00345631
-0.00179994	-0.000680321	-0.00353221
-0.0006869	-0.000674134	-0.00297801
0.00117536	-0.00063712	-0.00250096
0.00163035	-0.000535888	-0.00295766
0.000692693	-0.000405762	-0.00406543
1.57081e-05	-0.000319974	-0.0044914
-3.28168e-05	-0.00032235	-0.00383238
0.000486597	-0.000332837	-0.00329369
0.00058136	-0.000360674	-0.00393402
0.000868887	-0.000432872	-0.00445537
0.000890896	-0.000557281	-0.00402414
-0.000436634	-0.00067095	-0.00337965
-0.00147799	-0.000654366	-0.00323539
-0.00163748	-0.000552286	-0.00331167
-0.00102926	-0.000501282	-0.00363684
-0.000137325	-0.00048541	-0.00408779
-8.42276e-05	-0.000457795	-0.00421533
-0.000457041	-0.000483113	-0.00400804
0.000203778	-0.000470986	-0.00396501
0.000603649	-0.000463224	-0.00414608
-0.00037823	-0.000582253	-0.00360371
-0.000745226	-0.000672912	-0.00242375
-0.000143495	-0.000697424	-0.000973509
-0.000326249	-0.000644227	0.000273488
-0.00111728	-0.000214597	-0.00136896
-0.00139345	0.000962505	-0.00370372
-0.00104773	0.00175968	-0.00427915
-0.000168835	0.000880327	-0.00339219
0.000228794	9.91506e-05	-0.00247401
-0.000138523	-2.72423e-05	-0.00288517
-0.00053448	-0.00028378	-0.00332583
-0.000237946	-0.000600933	-0.00325377
0.000101401	-0.000707542	-0.00355857
0.00109494	-0.00065428	-0.00363496
0.00230555	-0.000596611	-0.00329552
0.00191734	-0.000392915	-0.00263141
0.00107605	-0.000177774	-0.00188734
0.00111732	-0.00035299	2.63947e-05
0.00502773	-0.000478543	0.00480614
0.0094237	0.000161047	0.00761847
0.00933213	0.00191318	0.00242513
0.00863318	0.00288884	-0.00263269
0.00512325	0.00128942	-0.00362837
0.00145142	-0.00031603	-0.0029396
0.00228305	-0.0005747	-0.00214293
0.00442676	0.000164103	-0.00290423
0.00300889	0.00195125	-0.0039624
0.00104437	0.00289622	-0.00447877
0.00177977	0.00134274	-0.00454687
0.00417845	4.96539e-05	-0.00438829
0.00592959	0.00266367	-0.00428687
0.00450719	0.0138866	-0.00419064
0.00192376	0.0232784	-0.00355563
0.00128636	0.0139234	-0.00286189
0.0012683	0.00270778	-0.00330037
0.000681028	-0.000183752	-0.00393992
0.000351418	-0.000449167	-0.0039701
0.00130988	-0.000495961	-0.00420961
0.00138583	-0.000491681	-0.0046617
0.00102793	-0.000542331	-0.00467624
0.00228664	-0.000631221	-0.00385184
0.00383246	-0.000673404	-0.00159942
0.00712695	-0.000638381	0.00021071
0.0142282	-0.000612672	-0.00143463
0.0176293	-0.000594835	-0.00308852
0.0105292	-0.000475598	-0.0030651
0.00844334	-0.000312635	-0.00345821
0.021775	-0.00027421	-0.00391408
0.031847	-0.000317871	-0.00347426
0.0178258	-0.000324279	-0.00270791
0.00315205	-0.000429479	-0.00142094
4.00672e-05	-0.000565288	0.00427795
0.000865189	-0.00053962	0.00894945
0.00161341	-0.000402667	0.00351788
0.00141344	-0.000322546	-0.00259502
0.000288424	-0.000357824	-0.00384097
-0.000592515	-0.000472258	-0.00370363
-0.000434505	-0.000580935	-0.00394194
0.00022233	-0.000574239	-0.00395762
0.000374688	-0.000518709	-0.00297874
0.000803895	-0.000492727	-0.00192032
0.00135517	-0.000546102	-0.00273197
0.000293005	-0.000640682	-0.00406093
-0.000728813	-0.000667278	-0.00459598
-0.000270393	-0.000641063	-0.00478555
0.000170766	-0.000633894	-0.00467141
4.19502e-05	-0.000643952	-0.00427708
0.000254252	-0.000563625	-0.00408574
0.00063723	-0.00042609	-0.00430079
0.00107476	-0.000413188	-0.00461742
0.000818499	-0.000545915	-0.00471104
-7.62997e-06	-0.000667866	-0.00453272
5.07224e-05	-0.000674066	-0.00426035
0.000770339	-0.000608571	-0.0040203
0.000593789	-0.000634908	-0.00406083
0.000106423	-0.000710656	-0.00405083
0.000416837	-0.000669771	-0.00383272
0.00118264	-0.000552283	-0.00386532
0.00316518	-0.000496247	-0.00379833
0.00470463	-0.000595493	-0.00383738
0.00317198	-0.000723364	-0.00406765
0.000700424	-0.000756148	-0.00394391
-0.000106459	-0.000722622	-0.00396091
0.000445867	-0.000684717	-0.00451395
0.000402711	-0.000637915	-0.00481797
0.0003927	-0.00067655	-0.00398469
0.00190439	-0.000749526	-0.00102918
0.00406243	-0.000764517	0.00262835

## Sheet: Fig_3
Gain -10 box	Gain -35 box	Lose -10 box	Lose -35 box										no -10	yes -10						no -35	yes -35
-0.0443197	-0.0229567	-0.0185185	-0.0142332										1.29482	2.98148						1.54237	1.6
-0.0249707	-0.0247863	-0.0155556	0.00494908										1	3.63269						1	1
-0.0269841	-0.0428276	0.0167442	-0.0103189										1.02703	3.43137						1.05213	1.7
-0.0334845	-0.0338164	-0.00817403	-0.0065331										1.09565	3.41441						1	1.90625
-0.0549451	-0.0350445	-0.0603338	-0.0709382										1.14894	3.21787						1	1.80769
-0.0272681	-0.0152147	0	-0.0276518										1	3.08731						1.58333	1.94118
0.275165	0.0848684	-0.316853	-0.0207406										1.33673	3.05155						1.14286	1.09524
0.0181818	-0.030593	-0.380396	0.333333										1.26316	3.04762						1.28571	1
-0.0377358	-0.037594	-0.4	-0.0878719										2	3.58904						1	1.88889
-0.0379747	-0.0313302	-0.115496	-0.100499										1.4	3.62828						1.21852	1.61538
-0.0377358	-0.0380952												1.23684	3.03947						1	1.85714
-0.0377358	-0.0382514												1.27586	3.13937						1.16667	2
0.0160714	0.080023												1	2.99417						1	1.2268
-0.0377358	-0.03125												1.30769	3.66292						1.34454	1.53571
-0.0382433	-0.0238095												1.19738	2.96508						1.2069	1.28571
0.0274791	0.46462												1	3.01966						1.55556	1.90909
-0.0342128	-0.0772645												1.11111	3.09953						1	2
0.0980827	0.744444												1.03704	3.03478						1.19761	1.79167
0.0498013	-0.0555556												1.76923	3.02456						1	1.73333
0.0321571	0.0588235												1.03185	3.65672						3	1.80303
-0.03125	0.387646												1.55556	3.11111						1.016	2
-0.03125	-0.0555556												1.04167	3.0664						1	1.74332
-0.0238095	-0.0555556												1.64706	3.05034						1	1.95455
1.75294	-0.0555556												1.40828	2.97222						1	1.8
0.830303	0.5												1	3						2	1.90909
-0.0772645	0.365854												1.06667	3.68465						1.97297	1.55556
0.444785	0.908139												2	3.56863						1.075	1.91667
0.778788	0.800326												1	3.02522						1.01163	1.83333
-0.0319101	0.46653												1	3.04262						1.0411	1.6
-0.0308642	-0.357143												1.07407	3.07704						1.13537	1.84615
-0.0555556	-0.350111
0.256629	-0.0484217
0	-0.0909091												2479.55	37135.5						3698.59	7096.61
0.641064	-0.0909091												2770.94	31271.5						2259.04	10442.6
-0.190476	-0.0909091												2965.94	31534.1						2548.75	8224.62
-0.0909091	-0.0872132
1.99008
Gain -10 boxes	Gained -35 boxes
52	53
59	56
46	45
46	45
47	49
41	30
36	39
41	39
49	41
55	46
26	44
40	41
32	37
31	38
31	36
43	45
37	30
36	33
38	38
52	45
47	47
43	41
40	39
32	35
38	49
23	29
32	30
32	37
43	39
38	43
37	38
37	35
31	29
33	34
35	37
36	33
36	41
34	38
41	33
36	39

## Sheet: Fig_4
Lose -10	Lose -35	Gain -10	Gain -35							no -10	yes -10					no -10	yes -10
-0.330967	-0.33411	0.950408	0.949333							3.47881	3.99667					1.23077	1.8
-0.389497	-0.12923	0.57004	-0.666667							3.00803	3.992					1.125	1.07407
-0.569565	-0.145565	-0.895833	0.181818							3.22222	4					1.15686	1.64
-0.733333	-0.182853	-0.413333	-0.785932							3.30769	4					1.27547	1.1875
-0.821169	-0.888715	-0.278708	0.184698							3.06818	3.9375					2.63333	1.71094
-0.192357	-0.333333	0.972357	-0.218182							2.18214	3.85					3	1
-1.41142	-0.407937	-0.349302	-0.809645							3.025	3.8459					2.41176	1.64706
-0.663633	-0.24212	-0.605881	-1.06249							3.06667	3.83871					3.86076	1.13043
	0.268085	0.779738	-0.230643							3.67797	3.97413					1.36364	1.10256
	-1.57293	0.382353	-0.605644							3	3.97826					2.78204	1.11842
	-0.713462	-0.609513	-0.620575							1.19417	3.95588					1.5	1.51389
	-0.47641	0.32765	0.375							3.2439	4					3.75758	1.5
	-0.45253	-0.450539	0.347222							3.9507	4					2.45745	1.16883
	-0.5	-0.472973	-0.444379							3.125	4					1.32	1.11765
		-0.525321	-0.442825							1.87402	4					2.17241	1.18987
		-0.421776								3.12245	3.98077					1.52174	1.225
										2.98305	3.96629					1.97826	1
										2.14957	4					2.74737	1.2381
										3.33333	3.95652					3.68889	1.76585
										3	3.97729					2	1.57432
										3.82143	3.976					2.02	1.06667
										3.82051	3.99047					2.21053	1.15385
										4	3.99587					1.45714	1.05882
										3.71429	4					1.24194	1
										3.86207						1.10811	1.45455
										3.01068						2.70247
										2						2.27586
										3.48387						3.74706
										3.48						2.75309
										3.60177						2.78035
										36020	47426.5					44585.6	3080.39
										34376.2	43756.1					48335.2	3071.44
										35009.7	42898.1					30595.4	2885.78

## Sheet: Fig_5
Parent	GFP_differences	RFP_differences						P22-GFP dh5a	P22-GFP hns	P12-RFP dh5a	P12-RFP HNS		C)	To make the logos, copy the respective column and paste it as an input into the Weblogo web portal: https://weblogo.berkeley.edu/logo.cgi			P22-GFP	P12-RFP
P1	59.0018	41.9754						1872.41	12626.2	444.428	787.702			ATTTAATAAAAA			0.23775	0.531551
P2	1006.16	-17.5523						2666.29	8089.92	506.845	827.845			ATTTATCATATT			0.521599	0.336389
P3	-4.19052	5.07184						1770.19	8982.99	491.435	775.645			ATAAATTAAATG			0.0928571	0.129636
P4	-1.12622	3.67489						3483.56	12234	562.557	867.392			ATTAATCATAAA			0.135417	0.337933
P5	0.791932	2.37119						2322.52	8848.16	597.442	1003.26			ATTAAAGAAATA			0.211042	0.340923
P6	-1.73702	33.6259						5188.29	9551.11	564.854	784.572			ATAAAACGAATA			0.268266	0.229567
P7	-5.52241	11.0564						3800.85	8144.2	603.748	764.503			AAATAATAAAAT				0.1326
P8	10.1879	41.4802						3704.7	7888.5	576.045	921.08			ATATATCGACAT				0.129825
P9	-5.88749	3.41034						3126.22	9745.99	553.171	859.926			ATATCATTTAAT				0.153838
P10	-3.5492	2.90849						3082.47	10560.4	622.104	866.545			ATATATCCAGAA				0.182098
P11	-8.18765	2.51547						6527.85	8683.89	619.235	836.618			AGAAATTAAAAA				0.196325
P12	6.1644	281.795						7094.35	9738.63	514.793	743.106			ATAATTCAAGTT				0.100252
P13	-6.66655	39.602												TTATTTTAAATT				0.0611145
P14	-5.37476	17.0251												ATTAAATTAGAA				0.28143
P15	-5.91948	0.225565												ATATTATCAATA				0.31145
P16	-2.66135	6.55297												ATAAAATATTTG				0.19604
P17	-18.0634	31.1573												ATTTATTGGATT				0.505301
P18	30.559	21.2535												ATAATTGAAGTT				0.122827
P19	664.524	38.6622												ATTAAGCGAAAA
P20	1171.92	-169.97												ATTAATCCTTTT
P21	-0.819047	26.215												ATTTATTCCATG
P22	5871.19	2.89785												ATTTCATACCAT
P23	-14.2482	2.32054												ATTTAACCAGAG
P24	6.46062	6.75233												ATATATCGAACA
P25	12.9901	1.36218												ATGTCACACTTT
														ATATCAGTTATA
														AAATATTTTAAT
														ATATAACCTTTG
														ATTAAATAAGCA
														ATGAATTAGATG
														ATATTTGTTGTT
														ATGAATCAGGAA
														TTATCTCGACAA
														ATAAAGGAATCT
														AAAATATATTTT
	Random 100 entries selected							Random 100 entries selected						TTTTATTCCCAT			Random 100 entries selected
	No HNS	HNS						No HNS	HNS					TTATCTTTTCAT			No HNS	HNS
	2.78571	1.45455						3.89189	2.88446					ATTCTGGAAAAA			4	3.20748
	2.05263	1.93478						3.61323	3.04348					ATTCCTGGCTAT			3.74036	3.20168
	1.79412	2.36667						1.79565	3					TTTACACTTTAT			3.22222	2.80435
	2.01266	1.8						3.20312	3.90566					ATCTCGTTAATT			3.18919	3.41176
	3.17647	1.61053						3.97872	3.21429					TTTTCTGGCTAA			3.70588	3.07143
	3.85246	2.03125						4	3.0813					AATTAATGTGAG			3.46512	3.17241
	1.07692	1.25						3.22253	2.99134					AAAGAACAAATT			3.90426	3.40557
	1.44776	1						3.9763	3.09639					TTGTTATGCTAT			3.3	2.45614
	2.83784	2.27273						3.96499	3.79365					ATTTCACACAGG			2.48101	2.125
	3.77419	1.09091						3.64286	3.29545					ATGCTGCAATTA			3.91327	3.90833
	1	1						3.88971	3.30556					AAAAAGTGACTA			3.04048	3.89005
	2.74419	3.39837						3.98815	3.06977					TTTTAGGCTGAT			3.92405	2.89655
	1.10345	2.77419						2.16216	3.80556					ATGATACAAATC			2.40455	3.97794
	3.45763	1.64444						3.06744	3.71141					AGACCATTAAAG			3.90372	3.47868
	2.89474	1.94828						3.60294	1.375					CTTAATGCACAT			3.97917	3.24501
	1.0597	1.44186						3.46516	3.11198					TTGCCTCAGATT			3.70192	2.73333
	2.96552	1						3.66049	3.014					TTGTGTGGAATT			4	3.21989
	1.82857	1.15385						3.97414	3					AGCTCACTCATT			3.15094	1.23853
	3.83168	2.64179						3.03279	3.23913					TGGAATTGTGAG			3.88889	2.8156
	2.76829	2.59028						3.16667	3.60045					CTTTATTGCTGT			3.9784	3.29167
	1.97015	2.5						3.85405	3.40851					AGGCCGGAATAA			3.97506	3.89091
	1.51429	1.85455						3.16949	1.25					CGGCATTAAGTA			3.85185	1.91
	1.61111	2.89344						3.912	3.25					GGAACTGACTAT			3.55102	3.05556
	2.78571	1.71429						3.93548	2.5								3.08696	1.33333
	2.4152	2.74227						2.15094	2.98819								3.24638	3.3871
	3	2.83333						3.68627	3.03981								3.00088	3.09985
	2.68519	1.02597						3.06803	3								1.33898	2.96995
	2.87097	2.74011						3.95037	1.46512								3.78125	3.23256
	2.05882	1.70588						3.42188	3.94872								3.93103	2.45833
	2.84615	2.88679						3.09125	3.54688								3.97849	2.10577
	3.60465	1.6875						2.03165	3.14894								2	2.91429
	2	2.9375						3.68571	3.45161								2.75258	2.02247
	2.33333	2.95						3.1619	3.70398								3.95506	3.16563
	1.2	2.93284						3.36842	3.79355								3.9686	3.15942
	1.2	2.10976						3.81132	2.77741								3.94033	3
	3.57576	2.48214						3.12245	3.27273								3.64028	2.24
	1.17073	1.23529						3.75581	3.88								3.6	3.33846
	1	1.31373						4	3.06667								3.53333	3.50824
	2.45946	2.67889						3.41509	3.09091								3.9759	3.47053
	1.10526	1.8211						3.15556	3.99256								3.14286	3.83614
	2.96364	3						3.91046	3.04								3.98556	3.46341
	1.09375	1.21076						3.85	3.3871								3.31633	3.44444
	1.52381	2.6						3	3.71154								3.83673	3.08079
	2.68276	1						3.07407	3.95486								3.98502	3.49438
	3.59698	2.57995						3.55752	4								3.98684	3.47561
	3.29032	2.76897						3.05525	2.9125								3.92279	3.7619
	1.15152	3						3.16912	3.06091								3.98858	3.12731
	1.22222	1.11765						1.83333	3.0404								3.72414	3.32056
	4	3.76796						3.91419	3.2439								3.54728	2.85
	3.24	2.14583						3.09756	3.11627								3.75	3.12821
	2	1.4						3.79188	2.98851								3.94118	3.40241
	3.28571	2.87234						3.97826	2.7349								3.63492	2.97674
	1.90741	2.47737						3.02531	1.16								3.17105	3.7931
	2.68116	2.86111						3.06098	3.09524								3.86916	3.7013
	2.5873	3						3.89362	2.91304								3.14865	3.125
	2.31915	3.87373						1.52381	3.06061								2.04545	3.83654
	2.8	1.43728						3.4713	3.2973								3.65517	3.88571
	1.27273	2						3.07388	2.57576								3.98438	2.15
	1.25806	2						2.93961	3.96277								3.66667	3.40157
	2.06667	1.98387						3.86076	3.14286								3.3875	3.98601
	1.32727	2.46595						3.57741	3.26829								3.98649	3.49558
	2.55556	1.9375						4	3.13793								3.85714	3.54237
	2.98601	2.75281						3.05357	2.32609								3.99152	2.00862
	2.74194	1.61084						3.93182	3.29457								3.99067	3.98973
	2.97159	2.1118						3.025	3.53574								3.93478	3.04243
	4	1.24194						4	3.0843								3.85425	3.10174
	1	2.25						3.784	3.78481								3.9	3.99491
	3.51724	2.48684						3.99145	2.71429								3.92105	2.98113
	1.96875	1.09091						3.14667	3.32353								3.78896	3.96211
	2.69388	1.37736						3.67188	3.37363								3.94416	3.26772
	1	2.97826						3.91038	2.73333								3.33518	3.56509
	3.08065	1.9						3.46429	1.75								3.80556	3.83333
	1.1	2.12121						3.56944	2.98773								2.02144	3.50994
	2.28947	3.09502						3.60465	2.88235								2.95736	1.66667
	3.22548	1.92754						3.20879	4								3.52	2.45
	1.5	1.35294						2.86575	3.66667								3.90541	3.03579
	2.94805	1.51323						3.925	3.13612								3.96808	3.0362
	3.36943	1.45455						2.95658	3.8406								3.91046	3.06667
	2.46582	3.36207						3.04507	1.23469								4	3.09091
	2.32039	1.06667						3.14679	2.99628								2.72727	3.87273
	2.89011	3.4759						3.67033	3.96552								3.66038	3.17682
	2.86275	2.74699						3.59504	3.02564								3.41667	3.03333
	3.96443	2.86702						3.81633	3.104								3.93414	2.69509
	2.05128	2.37037						3	3.95687								3.97062	2.96078
	3.71053	1.9375						3.16957	3.86826								3.87903	3.76238
	4	1.64286						3.57143	3								3.65135	2.375
	2.06897	3						3.61728	3.50459								3.86207	3.1
	3.4902	2.53023						3.84884	3.24593								3.26122	3
	2	2.18889						3.88889	3.88018								2.41352	3.99065
	2.6	1.56						3.09615	3.99273								3.29554	2.99796
	1.91176	1.07792						3.94059	3.08182								3.32748	3.16092
	2.25806	1.97778						3.99707	3.29554								3.62475	3.41875
	1	3.55621						3.52941	3.18182								3.21875	2.57143
	3.24828	3.73418						3.04348	3								3.95143	2.97283
	2.85714	1						3.70238	2.8125								3.52446	3.3
	2.03738	1.82143						2.84615	3.00237								3.80328	3.73864
	1.07273	2.68807						3.98715	3.52778								3.57436	2.90244
	1	1.09091						3.90385	4								3.96104	2.19231
	3.82941	2.81481						3.77778	2.86667								1.89335	2.5625
	1.21429	2.69014						3.58228	3.10909								3.62264	1
